# Supplementary material
Source: PubMed Central journal article supplement (PMC5218894)
Supplement: NIHMS832071-supplement-10858_2016_74_MOESM1_ESM.pdf [file NIHMS832071-supplement-10858_2016_74_MOESM1_ESM.pdf]

**$^{15}\text{N}$  and  $^{13}\text{C}$ - SOFAST-HMQC editing enhances 3D-NOESY sensitivity in highly deuterated, selectively [ $^1\text{H}$ ,  $^{13}\text{C}$ ]-labeled proteins.**

Paolo Rossi, Youlin Xia, Nandish Khanra, Gianluigi Veglia, and  
Charalampos G. Kalodimos

*Department of Biochemistry, Molecular Biology and Biophysics, University of Minnesota,  
Minneapolis, MN 55455*

**Supporting Information**

## Table of Contents

|                                                                                             |    |
|---------------------------------------------------------------------------------------------|----|
| <b>Table S1.</b> Measurement of selective $T_1$ recovery.                                   | 3  |
| <b>Table S2.</b> List of SOFAST-NOESY sequences.                                            | 4  |
| <b>Figure S1.</b> Selective pulses excitation profiles.                                     | 5  |
| <b>Figure S2.</b> Ernst angle ( $\alpha$ pulse) optimization (1).                           | 7  |
| <b>Figure S3.</b> NOE Intensity vs. Mixing time for 3D HMQC-NOESY-HMQC.                     | 8  |
| <b>Figure S4.</b> Ernst angle ( $\alpha$ pulse) optimization (2).                           | 9  |
| <b>Figure S5.</b> Aro-Methyl 3D- $^{13}\text{C}$ -SFHMQC-NOESY-HMQC ( $F_1$ - $F_3$ plane). | 10 |
| <b>Figure S6.</b> 2D S/N comparison d1=0.2 s (HMQC, HSQC, TROSY, SOFAST-HMQC).              | 11 |
| <b>Figure S7.</b> 2D S/N comparison at d1=1.0 s and in double-labeled samples.              | 13 |
| <b>Figure S8.</b> Effect of residual $-I_z^X$ magnetization in X-YH-type experiments.       | 14 |
| <b>Appendix S1.</b> Product operator for SOFAST-NOESY experiment.                           | 15 |
| <b>Appendix S2-S11.</b> Pulse sequences and parameters sets.                                | 16 |
| <b>Supplementary References.</b>                                                            | 28 |

**Table S1.** Measurement of selective  $T_1$  recovery in  $^{15}\text{N}$ , [ $^1\text{H}$ ,  $^{13}\text{C}$ ]-Ile $_{\delta 1}$ , [50%- $^1\text{H}$ ,  $^{13}\text{C}$ ]-Leu $_{\delta 1, \delta 2}$ , and Val $_{\gamma 1, \gamma 2}$  MBP at 32 °C.\*

| Variant of pulse sequence                                   | $^1\text{H}_\text{N}$ $T_1$ (s) | $^1\text{H}_\text{M}$ $T_1$ (s) |
|-------------------------------------------------------------|---------------------------------|---------------------------------|
| A 180° hard pulse (a1 + b1)                                 | 0.79                            | 0.89                            |
| A 180° hard pulse with water flip-back 90° pulses (a2 + b1) | 0.62                            | 0.84                            |
| A 180° shaped IBURP2 pulse (a3 + b1)                        | 0.40                            | 0.58                            |
| A 180° shaped IBURP2 pulse (a3 + b2)                        | 0.40                            | 0.60                            |

\*Inversion recovery measurements were conducted using the pulse sequence below with the a1, a2, a3, b1 and b2 variants. Faster recovery (shorter  $T_1$ ) is observed when pulsing selectively on either amides or methyls  $^1\text{H}$ 's and keeping water magnetization at equilibrium.

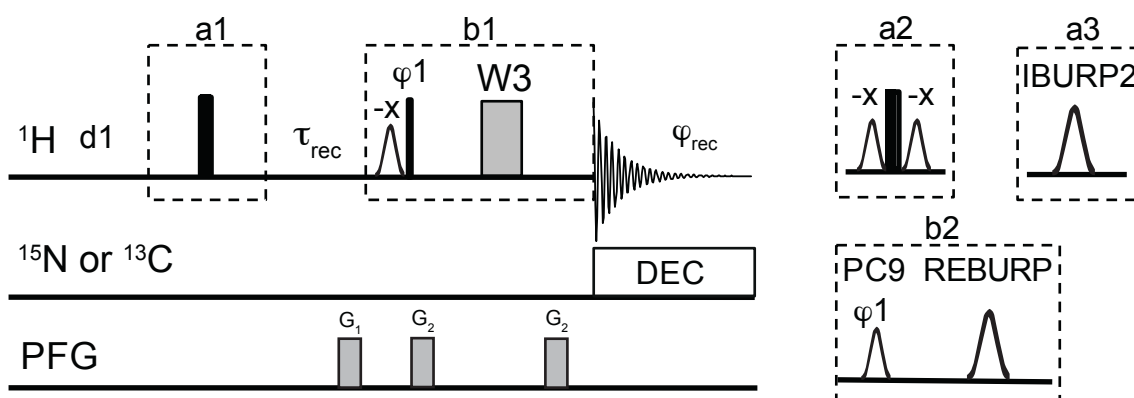

The pulse sequence of inversion recovery for the measurement of longitudinal relaxation time  $T_1$ . The narrow and wide bars represent 90° and 180° hard pulse. 1 ms long  $^1\text{H}$  90° water flip-back shaped pulse is of Sinc profile. Other  $^1\text{H}$  shaped pulses are of 1.69 ms PC9, 1.0 ms IBURP2 and 1.15 ms REBURP (Geen and Freeman 1991), respectively. The phase cycling is:  $\phi_1 = (x, -x, -x, x)$ ,  $\phi_{\text{rec}} = (x, -x, -x, x)$ . GARP is used for  $^{15}\text{N}$  or  $^{13}\text{C}$ -decoupling. The durations and strengths of the gradients are  $G_1 = (1 \text{ ms}, 15 \text{ G/cm})$ ,  $G_2 = (1 \text{ ms}, 5 \text{ G/cm})$ . Interscan delay (d1) is 4 s, and  $\tau$  is variable delay setting to 0.1, 0.2, 0.3, 0.4, 0.6, 0.8, 1.2, 1.6, 2.0 s, respectively, for each 1D spectrum. Different combinations are used to measure the  $T_1$  to evaluate the impact of water exchange transfer and isolate the effect of each individual moiety on overall relaxation. Inset a2 or a3 may replace a1, and inset b2 may replace b1. When measuring  $^1\text{H}_\text{N}$ 's  $T_1$ ,  $^{15}\text{N}$ -decoupling with its carrier offset at 118 ppm is used, and the offsets of the shaped pulses PC9, IBURP2 and REBURP are set to 8.5 ppm. When measuring  $^1\text{H}_\text{M}$ 's  $T_1$ ,  $^{13}\text{C}$ -decoupling with its carrier offset at 17 ppm is used, and the offsets of the shaped pulses PC9, IBURP2 and REBURP are set to 0.9 ppm.

**Supplementary Table S2\*** List of SOFAST-NOESY sequences.

| Index                     | SOFAST Sequence                                                              | Acquisition Dimension             |                                 |                                 | No. of spectra | Flip Angle ( $\alpha$ ) | Excitation shaped pulse         | Refocusing shaped pulse | Reference Sequence                                   | Test Sample |
|---------------------------|------------------------------------------------------------------------------|-----------------------------------|---------------------------------|---------------------------------|----------------|-------------------------|---------------------------------|-------------------------|------------------------------------------------------|-------------|
|                           |                                                                              | F1( $t_1$ )                       | F2( $t_2$ )                     | F3( $t_3$ )                     |                |                         |                                 |                         |                                                      |             |
| 1                         | <u>C<sub>M</sub>NH<sub>M</sub>H<sub>N</sub></u> (CN-HMQC)                    | N, C <sub>M</sub>                 | H <sub>N</sub> , H <sub>M</sub> |                                 | 1              | 120°                    | PC9_4                           | Reburp                  |                                                      | a, b        |
| <b>3D HMQC-NOESY-HMQC</b> |                                                                              |                                   |                                 |                                 |                |                         |                                 |                         |                                                      |             |
| 2                         | N-C <sub>M</sub> H <sub>M</sub>                                              | N                                 | C <sub>M</sub>                  | H <sub>M</sub>                  | 1              | 90-95°                  | PC9_4                           | Reburp                  | HMQC-NOESY-HMQC for N-CH                             | b           |
| 3                         | C <sub>M</sub> -NH <sub>N</sub>                                              | C <sub>M</sub>                    | N                               | H <sub>N</sub>                  | 1              | 90-95°                  | PC9_4                           | Reburp                  |                                                      | b           |
| 4                         | N-NH <sub>N</sub>                                                            | N                                 | N                               | H <sub>N</sub>                  | 1              | 110°                    | PC9_4                           | Reburp                  | HMQC-NOESY-HMQC for N-NH                             | b           |
| 5                         | C <sub>M</sub> -C <sub>M</sub> H <sub>M</sub>                                | C <sub>M</sub>                    | C <sub>M</sub>                  | H <sub>M</sub>                  | 1              | 110°                    | PC9_4                           | Reburp                  | HMQC-NOESY-HMQC for C-CH                             | a           |
| 6                         | <u>C<sub>Aro</sub>-C<sub>M</sub>H<sub>M</sub></u>                            | C <sub>Aro</sub>                  | C <sub>M</sub>                  | H <sub>M</sub>                  | 1              | 90-95°                  | PC9_4                           | Reburp                  | HSQC-NOESY-HMQC for C-CH                             | a,c         |
| 7                         | C <sub>Aro</sub> -NH <sub>N</sub>                                            | C <sub>Aro</sub>                  | N                               | H <sub>N</sub>                  | 1              | 90-95°                  | PC9_4                           | Reburp                  |                                                      | a           |
| 8                         | <u>NC<sub>M</sub>-NC<sub>M</sub>H<sub>N</sub>H<sub>M</sub></u>               | N, C <sub>M</sub>                 | N, C <sub>M</sub>               | H <sub>N</sub> , H <sub>M</sub> | 4              | 110° (90°)              | Cos-PC9_4                       | W5'                     | Time Shared (TS) H-CN-H HSQC-NOESY-HSQC <sup>§</sup> | b           |
| <b>3D NOESY-HMQC</b>      |                                                                              |                                   |                                 |                                 |                |                         |                                 |                         |                                                      |             |
| 9                         | <u>H<sub>N</sub>H<sub>Aro</sub>-C<sub>M</sub>H<sub>M</sub></u>               | H <sub>N</sub> , H <sub>Aro</sub> | C <sub>M</sub>                  | H <sub>M</sub>                  | 1              | 90-95°                  | PC9_4                           | Reburp                  | NOESY-HMQC                                           | a           |
| 10                        | <u>H<sub>M</sub>-C<sub>M</sub>H<sub>M</sub></u>                              | H <sub>M</sub>                    | C <sub>M</sub>                  | H <sub>M</sub>                  | 1              | 110°                    | PC9_4                           | Reburp                  | HMQC-NOESY-HMQC for H-CH                             | a           |
| 11                        | H <sub>M</sub> -C <sub>Aro</sub> H <sub>Aro</sub>                            | H <sub>M</sub>                    | C <sub>Aro</sub>                | H <sub>Aro</sub>                | 1              | 90-95°                  | PC9_4                           | Reburp                  |                                                      | b           |
| 12                        | H <sub>N</sub> H <sub>Aro</sub> -NH <sub>N</sub>                             | H <sub>N</sub> , H <sub>Aro</sub> | N                               | H <sub>N</sub>                  | 1              | 110°                    | PC9_4                           | Reburp                  |                                                      | a           |
| 13                        | H <sub>N</sub> H <sub>M</sub> -C <sub>M</sub> H <sub>M</sub>                 | H <sub>N</sub> , H <sub>M</sub>   | C <sub>M</sub>                  | H <sub>M</sub>                  | 2              | 90-95°                  | PC9_4                           | Reburp                  |                                                      | b           |
| 14                        | H <sub>N</sub> -NC <sub>M</sub> H <sub>N</sub> H <sub>M</sub>                | H <sub>N</sub>                    | N, C <sub>M</sub>               | H <sub>N</sub> , H <sub>M</sub> | 2              | 110° (90°)              | PC9_4                           | W5'                     |                                                      | b           |
| 15                        | H <sub>N</sub> H <sub>M</sub> -NC <sub>M</sub> H <sub>N</sub> H <sub>M</sub> | H <sub>N</sub> , H <sub>M</sub>   | N, C <sub>M</sub>               | H <sub>N</sub> , H <sub>M</sub> | 4              | 120° (90°)              | cosine and sine-modulated PC9_4 | W5'                     |                                                      | b           |

\* Entries are divided into the 3D-HMQC-NOESY-HMQC and 3D NOESY-HMQC groups. The underlined entries correspond to experiments described in full in the main text. The value of flip angle in parentheses give artifact-free spectra. Experiments 8, 13, 15 are intended for <sup>15</sup>N, methyl labeled proteins with no aromatic residues. Test samples: FliT-FliJ fusion <sup>15</sup>N-methyl/aromatic labeled (a); <sup>15</sup>N-methyl MBP (b). FliT-FliJ fusion double labeled (c).

<sup>§</sup>See Xia and coworkers for the 'Time Shared' (TS) CN-CN-H HSQC-NOESY-HSQC and H-CN-H NOESY-HSQC experiments. (Xia et al. 2003)

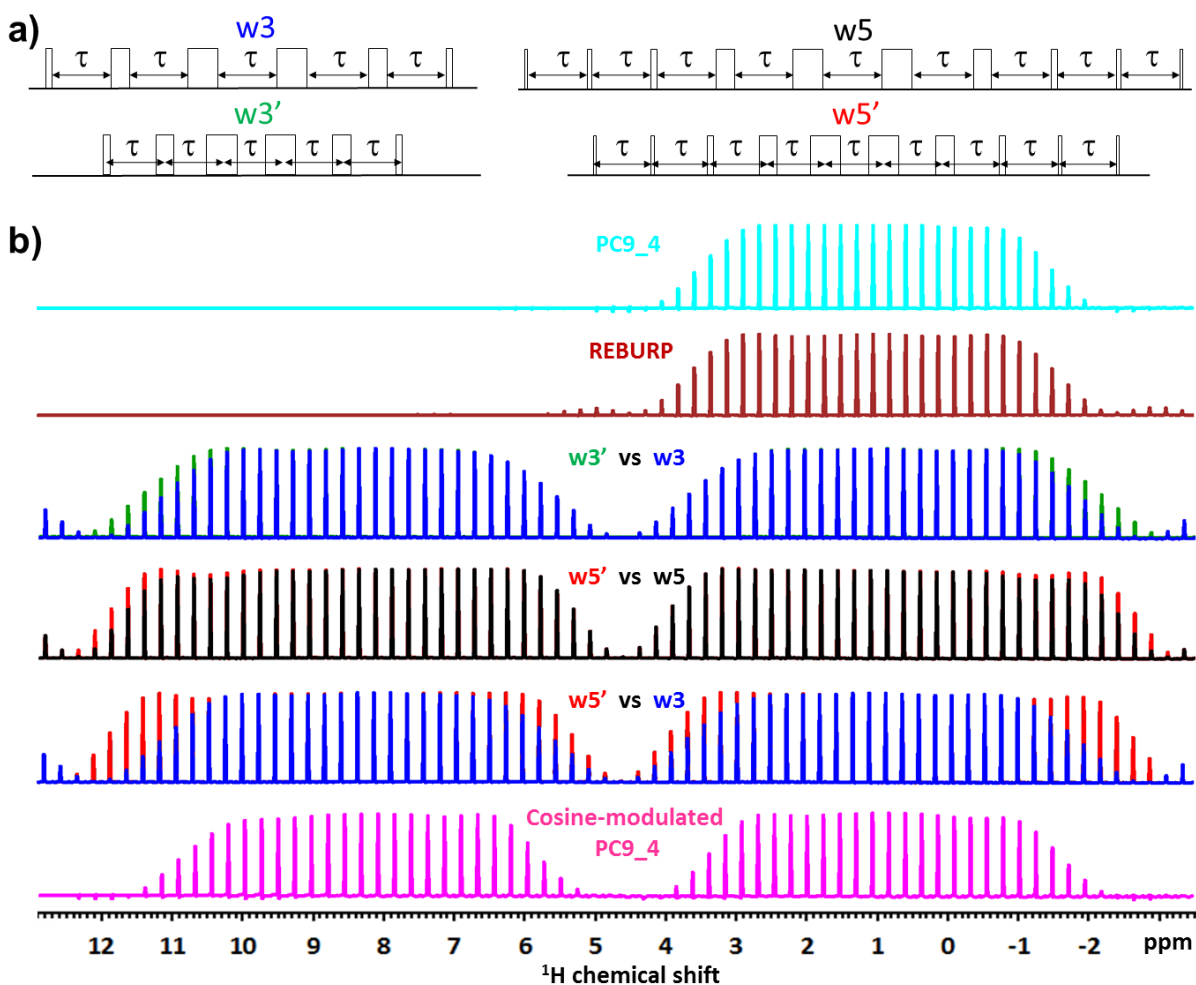

**Figure S1.** Experimental characterization of selective pulses excitation profiles. Pulse sequences of w3, w3', w5, w5' (a) and observed excitation profiles (b). In the pulse sequences w3 and w3', flip angles ( $\alpha$ ) and phases were  $20.8^\circ_x$ ,  $62.2^\circ_x$ ,  $131.6^\circ_x$ ,  $131.6^\circ_{-x}$ ,  $62.2^\circ_{-x}$ , and  $20.8^\circ_{-x}$ , respectively. In the pulse sequences w5 and w5', flip angles and phases were  $7.8^\circ_x$ ,  $18.5^\circ_x$ ,  $37.2^\circ_x$ ,  $70.0^\circ_x$ ,  $134.2^\circ_x$ ,  $134.2^\circ_{-x}$ ,  $70.0^\circ_{-x}$ ,  $37.2^\circ_{-x}$ ,  $18.5^\circ_{-x}$ ,  $7.8^\circ_{-x}$ , respectively.  $\tau$  was  $188 \mu\text{s}$  ( $= 1/d$ ,  $d$  is the distance in Hz between center and next null). To get the observing profiles of the PC9\_4, REBURP, w3, w3', w5 and w5', a spin echo pulse sequence ( $90^\circ_x + \text{PFG} + 200 \mu\text{s} + 180^\circ_x + \text{PFG} + 200 \mu\text{s} + \text{observe}$ ) was used. For PC9\_4 profile, the  $90^\circ_x$  was replaced with the PC9\_4 shaped pulse and the  $180^\circ$  pulse was a hard pulse. For REBURP, w3, w3', w5, w5's profiles, the  $90^\circ_x$  was a hard pulse and the  $180^\circ$  pulse was replaced with one of the REBURP, w3, w3', w5 and w5', respectively. The bandwidths of PC9\_4, REBURP and cosine-modulated PC9\_4 all were 4,250 Hz (5 ppm on 850 MHz spectrometer). To get the profile of cosine-modulated PC9\_4, the 2D NC-HMQC pulse sequence was used. A Bruker standard sample of 0.1 M  $^{13}\text{C}$ -labeled methanol in DMSO was used for the tests. Frequency offset was swept from -7,000 to 7,000 Hz in 200 Hz steps. For each profile, a total of 71 1D spectra were acquired. Each profile pair, “w3' vs w3”, “w5' vs w5”, and “w5' vs w3” is color-coded and superposed. A cosine-modulated PC9(Kupce and Freeman 1994) shaped

pulse and a W5-type inversion composite pulse(Liu et al. 1998) are used to excite and refocus both amide  $^1\text{H}_\text{N}$  and methyl  $^1\text{H}_\text{M}$ , respectively. The  $^{15}\text{N}$  and  $^{13}\text{C}$  spectral widths can be adjusted separately to their optimal values. W5', a modified version of W5(Liu et al. 1998) with the pulse spacing  $\tau$  measured from the center of the pulse instead of the pulse edge (Supp. Fig. S1) provides more ample and uniform inversion profile. However, either 3-9-19-WATERGATE (W3)(Sklenar et al. 1993) or W5 give bandwidth sufficient to cover the narrower excitation profile of the PC9\_4 selective pulse. The PC9\_4 pulse with appropriate  $^1\text{H}$  offset can have up to approximately 5ppm excitation bandwidth. Higher bandwidth settings reduce the water suppression effect. The cosine modulation produces a dual 5ppm excitation profile centered at the water resonance ( $^1\text{H}$  chemical shift  $\sim 4.7\text{ppm}$ ).

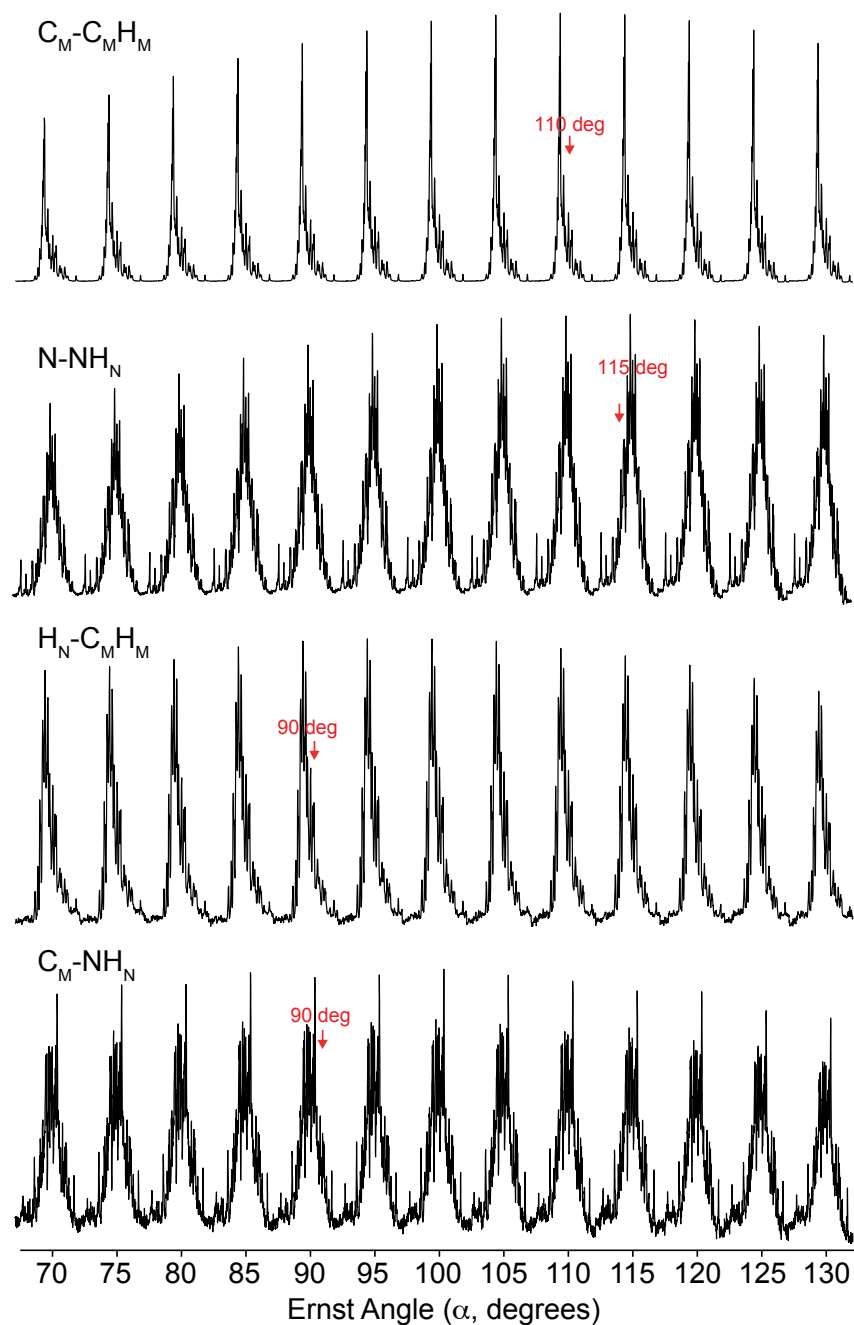

**Figure S2.** Ernst angle ( $\alpha$  pulse) optimization for the four SOFAST 3D HMQC-NOESY-HMQC variants as labeled. The optimization was conducted with  $d1 = 0.2$  s. The optimal  $\alpha$  value is indicated in red on each spectrum. Compatible magnetization that can transfer between scans is present only for X-XH type experiments. Low to no effect ( $< 5\%$ ) is observed in X-YH type experiment since the magnetization cannot be transferred from scan to scan. In that X-YH the  $\alpha$  pulse should be set to 90-95 degrees.

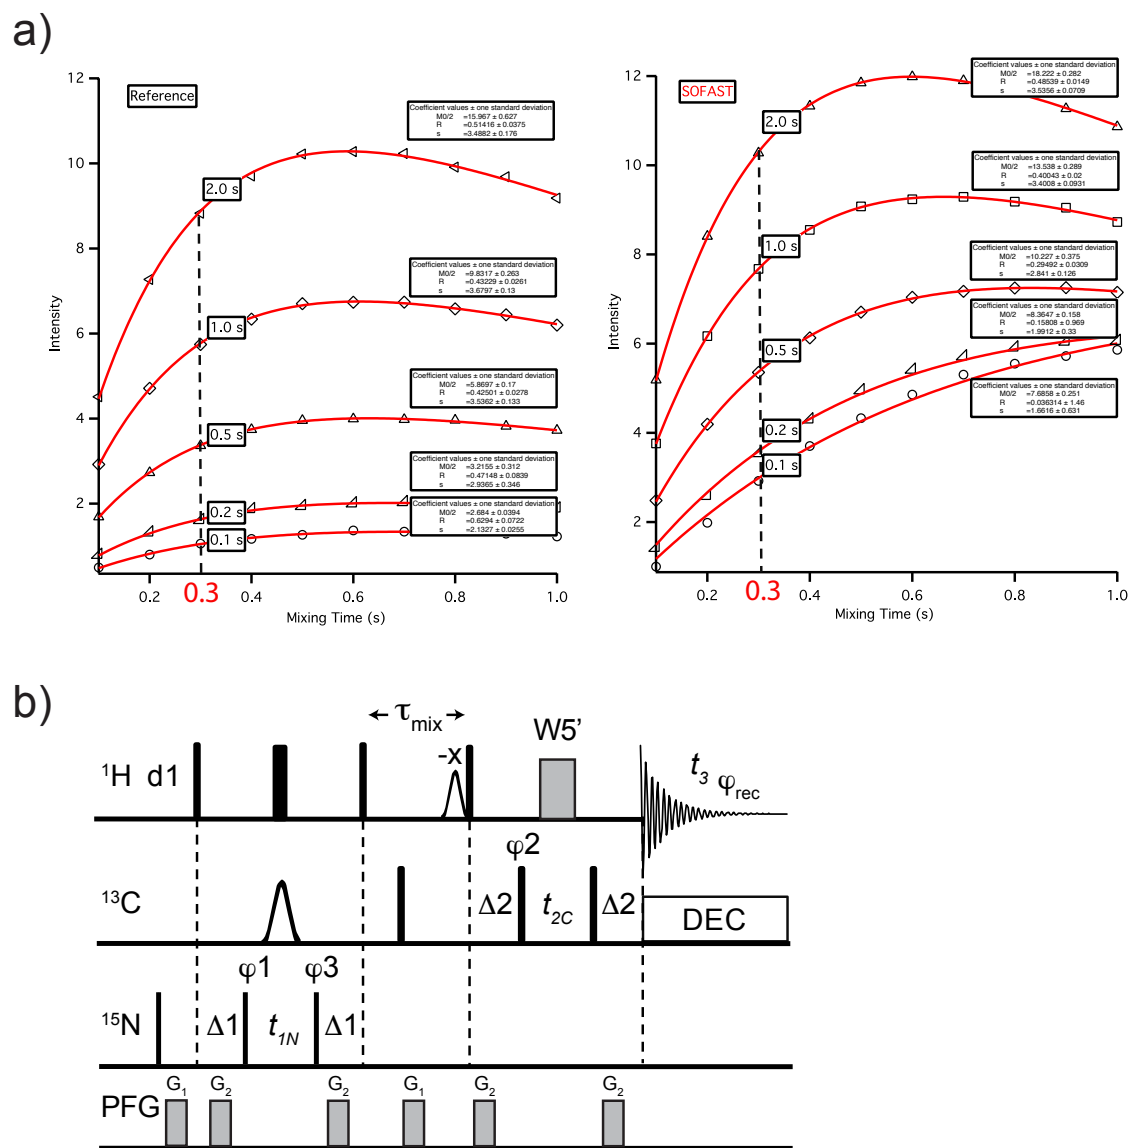

**Figure S3.** NOE buildup curves for MBP  $U\text{-}^{15}\text{N}$ ,  $[^1\text{H}, ^{13}\text{C}]\text{-Ile, Leu, and Val methyl}$  sample at 32 °C (a). Comparison the of reference and SOFAST HMQC-NOESY-HMQC (main text Fig. 1d) NOE buildup curves obtained with as a series of 1D spectra acquired with 64 scans. Integrated intensities vs. mixing time were plotted at five different d1 values: 0.1, 0.2, 0.5, 1.0 and 2.0 s as labeled on the graph. Curves were fitted as described in the main text. Reference diagonal-free 3D HMQC-NOESY-HMQC ( $^{15}\text{N}(F_1)\text{-}^{13}\text{C}_M(F_2)\text{-}^1\text{H}_M(F_3)$ ) with optimized W5'  $\text{H}_2\text{O}$  suppression (Liu et al. 1998) and flip-back pulse (b). The narrow and wide bars represent 90° and 180° hard pulse. The shaped pulse on  $^{13}\text{C}$  channel represents a 500  $\mu\text{s}$  long 180° smoothed CHIRP.(Hwang et al. 1997) The delays are: d1 = 0.2 sec,  $\Delta 1 = 5.2$  ms,  $\Delta 2 = 4.0$  ms,  $\tau_{\text{mix}} = 0.3$  sec. The phase cycling are:  $\phi 1 = (x, -x)$ ,  $\phi 2 = (x, -x, -x, x)$ ,  $\phi 3 = 4(x), 4(-x)$ ,  $\phi_{\text{rec}} = (x, -x, -x, x, -x, x, x, -x)$ . Bruker decoupling scheme bi\_garp\_2pl is used. The quadrature detections in  $t_1$  and  $t_2$  dimensions are acquired via States-TPPI of  $\phi 1$  and  $\phi 2$ , respectively. The durations and strengths of the gradients are  $G_1 = (1$  ms, 15 G/cm),  $G_2 = (1$  ms, 5 G/cm).



$C_{Aro}-C_M H_M$  (aromatic to methyl SFNOESY)

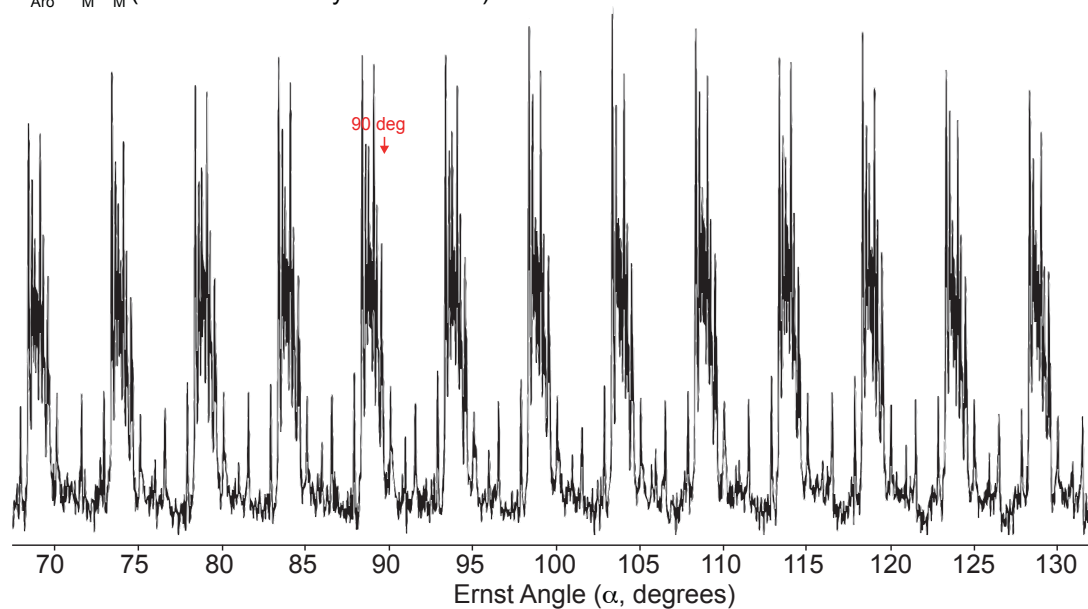

$NC_M-NC_M H_M$  (time shared SFNOESY)

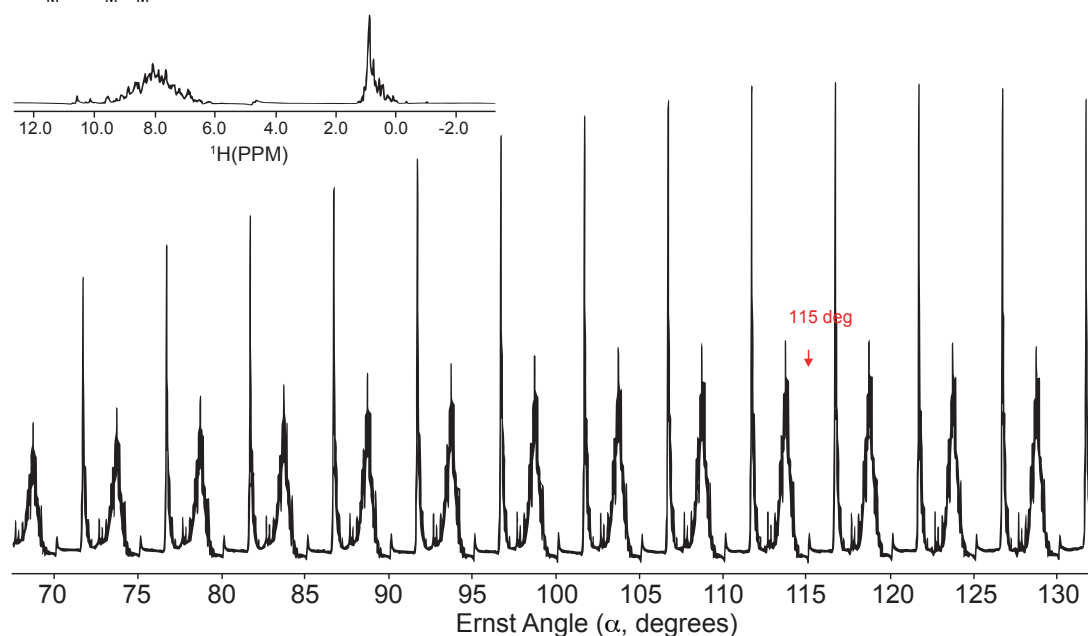

**Figure S4.** Ernst angle ( $\alpha$  pulse) optimization for time-shared SOFAST 3D CN-HMQC-NOESY-CN-HMQC (upper) and for aromatic-methyl SOFAST 3D HMQC-NOESY-HMQC (lower) at fast pulsing regime ( $d_1 = 0.2$  s). The optimal value for  $\alpha$  was found to be 115 degrees, and 90 degrees respectively. Please note: the SOFAST 3D CN-HMQC-NOESY-CN-HMQC is more sensitive to the changes in  $\alpha$  due to both amide and methyl magnetization sustaining the steady state polarization during fast pulsing. Lower effect ( $< 5\%$ ) is observed in X-YH-type aro-methyl experiment (b) as the magnetization cannot be transferred from scan to scan the pulse angle should be kept at 90-95°.

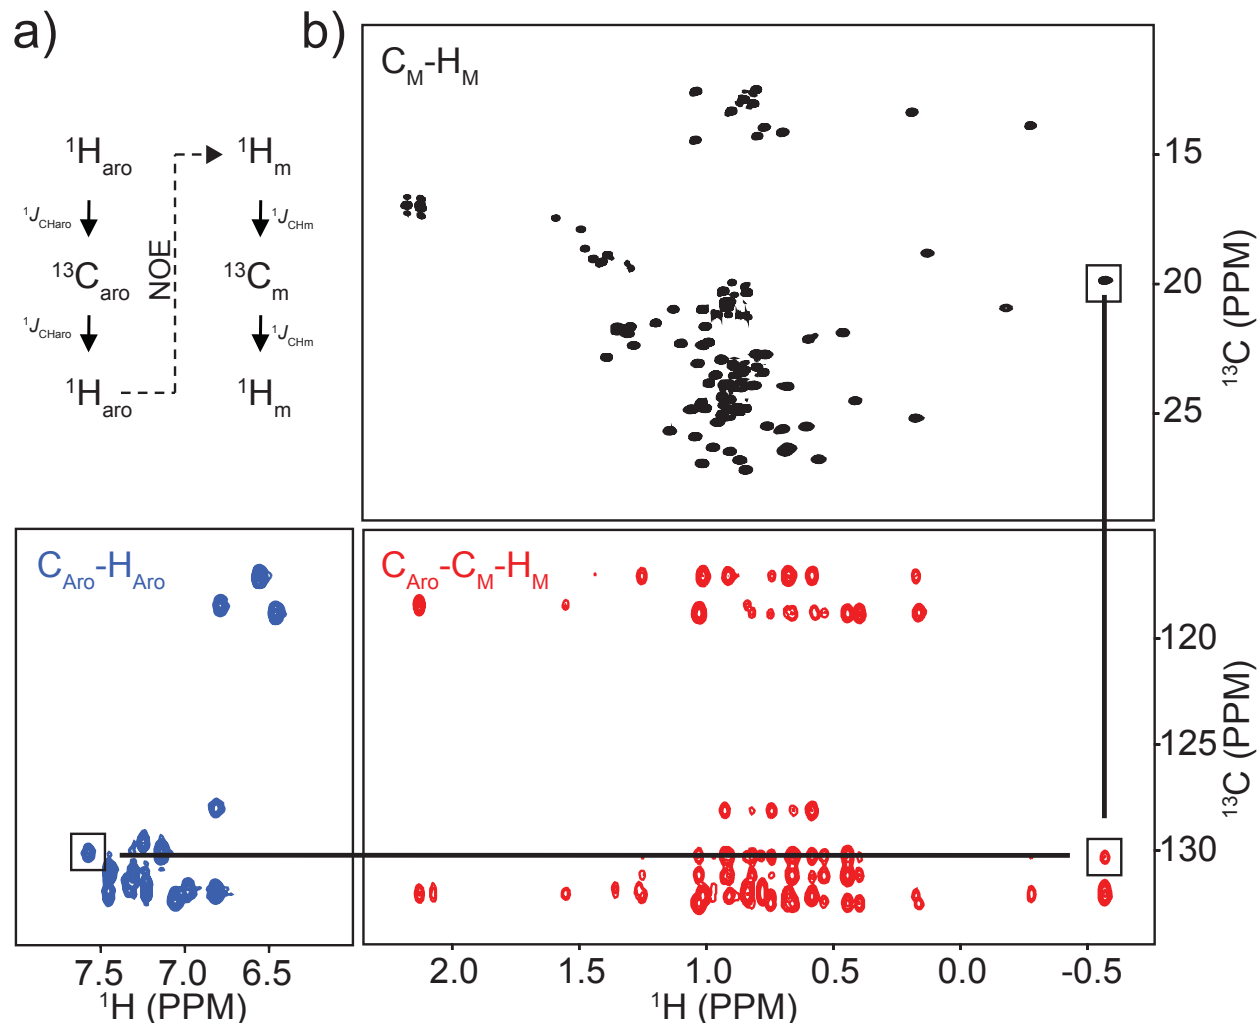

**Figure S5.** Panel a): schematic view of diagonal-free aromatic to methyl 3D- $^{13}\text{C}$ -SFHMQC-NOESY-HMQC experiment. Panel b): reference 2D  $^{13}\text{C}_{\text{Aro}}$ -SFHMQC spectrum (lower left spectrum in blue), reference 2D  $^{13}\text{C}_{\text{M}}$ -SFHMQC (upper right in black), and 3D SFHMQC-NOESY-HMQC projection (lower right in red). The FliT-FliJ protein used for testing is  $U$ - $[^2\text{H}, ^{15}\text{N}]$  and contains  $^1\text{H}$ - $^{13}\text{C}$  on all methyl residues and  $U$ - $[^{13}\text{C}, ^{15}\text{N}]$  on Phe and Tyr. The  $d_1$  was 200 ms with 32 scans per point and  $40 \times 80$  points and a total experiment time of 16 h. An example NOE crosspeak between Phe H $\epsilon$  and Val C $\gamma$  is marked on the spectrum and connected to the respective 2D reference dimensions.

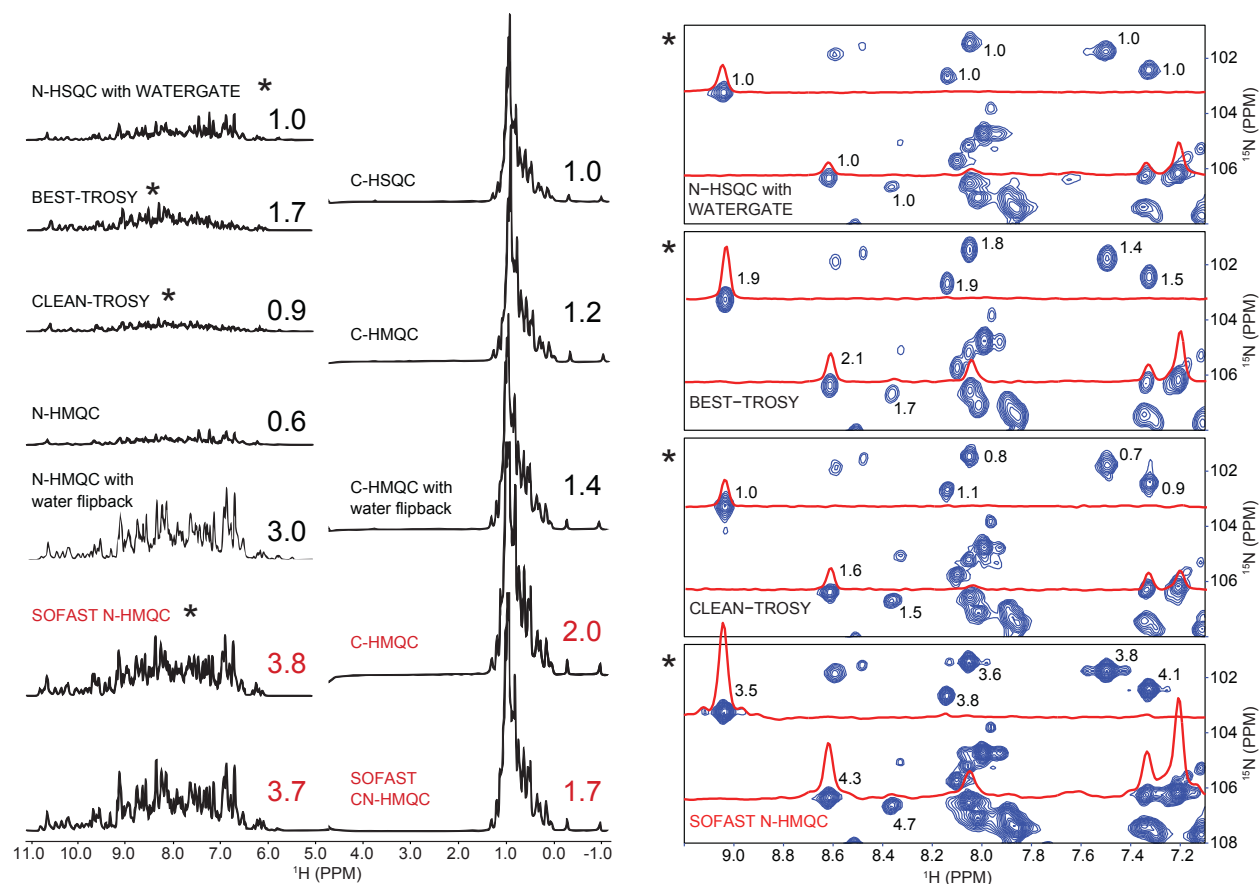

**Figure S6.** Comparison of the signal strength for  $^{15}\text{N}$  and  $^{13}\text{C}$  2D HSQC, HMQC, SOFAST-HMQC and TROSY experiment labeled as indicated. All the  $^{13}\text{C}$  correlation experiments use States-TPPI for phase sensitive 2D acquisition. All S/N figures indicated on the 1D strips on the left panel are derived from 2D data analysis. A sample of such analysis is shown on the right panel for selected  $^{15}\text{N}$  based experiments marked with an asterisk. The ratios of signal strengths are scaled separately to the  $^{15}\text{N}$  and  $^{13}\text{C}$  HSQC that are taken as '1'. All experiments (Schanda et al. 2005; Schulte-Herbruggen and Sorensen 2000; Solyom et al. 2013) were performed with same parameters using an  $^{15}\text{N}$ -methyl labeled MBP sample at 32 °C. The recovery delay (d1) was set to 0.2 s. In addition to recapitulating the findings of Schanda and coworkers (Schanda et al. 2005), a few interesting points emerge from analysis of the results. (i) The  $^{15}\text{N}$ -BEST-TROSY (Solyom et al. 2013) is 1.7 $\times$  more sensitive with fast pulsing than the 'N-HSQC with WATERGATE' while the CLEAN-TROSY (Schulte-Herbruggen and Sorensen 2000) is weaker (0.9 $\times$ ) than the  $^{15}\text{N}$ -BEST-TROSY due to more complicated pulse sequence and extra pulses that are used to remove anti-TROSY components. The main benefit of  $^{15}\text{N}$ -TROSY is to select for the slow relaxing components and it does so at the expense of overall sensitivity, while the resolution and sensitivity can be improved by increasing both  $t_2$  and  $t_1$  acquisition times. Please note that the TROSY experiment uses Echo-AntiEcho (Rance-Kay) for phase sensitive acquisition and that HMQC uses States-TPPI. The former enhances sensitivity in 2D by a  $\sqrt{2}$  factor.

(ii) Comparing the two spectra acquired with 'N-HMQC' and 'N-HMQC with water flip-back', the signal strength of the latter is 5.0 $\times$  (3.0/0.6) that of the former. Here, the prodigious

improvement is the result of the short  $d1$  ( $d1 = 0.2$  s) employed for the comparison. Under these conditions, the water magnetization recovery to steady state in the ‘N-HMQC’ is very minimal, and the water flip-back pulse in the ‘N-HMQC with water flip-back’ produces the observed boost in signal. The factor is reduced from 5.0 ( $d1 = 0.2$  s) to 2.5 ( $5.5/2.2$ ) with  $d1$  set at 1 s as shown in Supp. Fig. S4a. We also added a water flip-back pulse in the C-HMQC sequence and found that it had a significant effect on the sensitivity (1.2 to 1.4) but lower than on the amide spectrum.

(iii) Between ‘N-HMQC with water flip-back’ and SOFAST N-HMQC, the signal ratio is only changed by approximately  $1.3\times$  (from 3.0 to 3.8). These experiments should have similar water suppression effects at longer  $d1$ , and the other differences between the two are that the SOFAST N-HMQC uses  $120^\circ$  flip angle and the methyl’s magnetization, together with the  $\sim 5\%$  spurious protonation present in the sidechains our deuterated sample, in SOFAST N-HMQC is not perturbed resulting in a shorter  $T_1$  relaxation time.

(iv) The SOFAST CN-HMQC simultaneously acquires two HMQC with a 15% S/N sacrifice for its C-HMQC region and no L-optimized effect. At fast pulsing it manages to perform better than WATERGATE sequences with flip-back mainly due to Ernst angle effect. Presently, the N-HMQC spectral region in the SOFAST CN-HMQC does not use  $^{13}\text{C}$ -decoupling pulse at the center of  $t_1$  evolution. However, with its intended use for  $^{15}\text{N}$ , and selectively [ $^1\text{H}$ - $^{13}\text{C}$ ]-methyl labeled samples this is no cause for concern. In these types of samples, CA and CO are not  $^{13}\text{C}$ -labeled or expected to be. When running the experiment with  $U$ - $^{13}\text{C}$  labeled samples, cosine-modulated SEDUCE1 can be used to decouple  $^{13}\text{CA}/^{13}\text{CO}$  from  $^{15}\text{N}$  (Mccoy and Mueller 1992). The S/N of N-HMQC part is very close to that of simple SOFAST N-HMQC (3.7 vs 3.8) but still better than simple N-HMQC with flip-back (3.0). However, the C-HMQC part in the SOFAST CN-HMQC has an additional delay compared to a regular C-HMQC. During the first FID, the additional delay is  $2(\Delta_2 - \Delta_1)$  and for the last FID, the additional delay becomes  $TD \left( \frac{1}{2SW_N} - \frac{1}{2SW_C} \right) + 2(\Delta_2 - \Delta_1)$ , where  $TD$ ,  $SW_N$ ,  $SW_C$  are time domain size ( $2\times$  the number of increments), spectral widths of  $^{15}\text{N}$  and  $^{13}\text{C}$ , respectively. Given the normal values that are used for this experiment ( $TD = 148$ ,  $SW_N = 3101$  Hz,  $SW_C = 4383$  Hz,  $\Delta_2 = 5.2$  ms,  $\Delta_1 = 4.0$  ms), the additional delay goes from 2.4 ms to 9.4 ms. This compromise results in a modest 15% ( $=0.3/2.0$ ) signal loss. A small penalty in the signal strength of the C-HMQC part in the SOFAST CN-HMQC is paid, but in the end, the signal for the key methyl moieties is still 1.4 times ( $=1.7/1.2$ ) of that of regular C-HMQC. In 3D SOFAST NOESY experiments based on the 2D CN-HMQC, the  $TD$  may be set to as low as 64 points. In that case, the range of additional delay from first to last FID will be lower (2.4 ms to 5.4 ms), and the signal decay should be lower than 15%.

(v) The signal of the C-HMQC is  $1.2\times$  that of the C-HSQC. This increment is due to the shorter pulse sequence of the C-HMQC versus the C-HSQC and the methyl-TROSY effect.(Tugarinov et al. 2003) Also, SOFAST C-HMQC brings substantial improvement ( $1.2\times$  to  $2.0\times$ ) by means the fast recovery time between experiments due to its shorter  $T_1$  (L-optimized effect) and by Ernst Angle optimization ( $120^\circ$  flip angle) during fast pulsing.

a) Effect of water flipback with  $d_1 = 1$  s

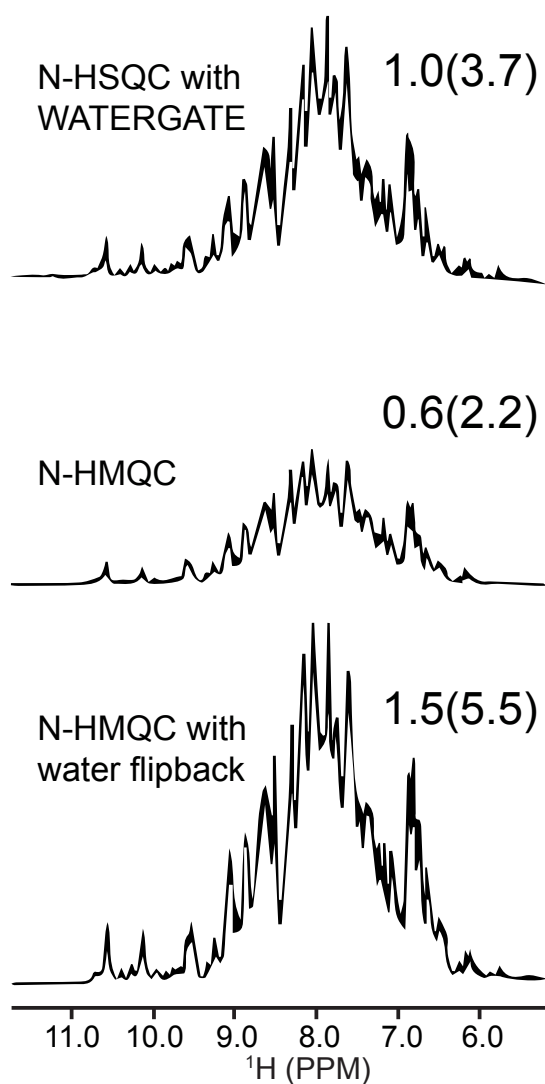

b) Effect of selective excitation with a  $^{15}\text{N}/^{13}\text{C}$  labeled sample.

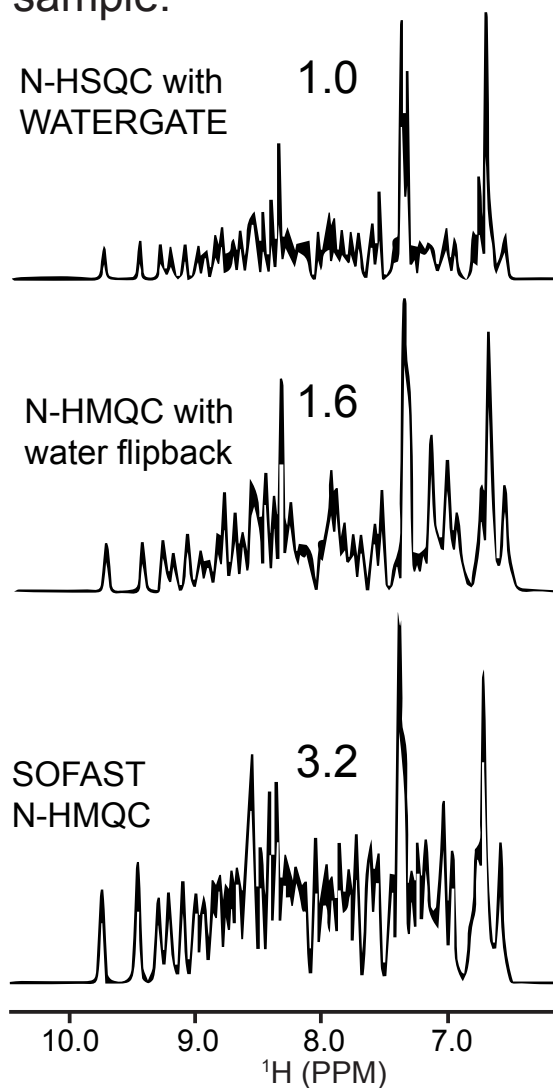

**Figure S7.** Comparison of the signal strength for the 2D HSQC, HMQC with and without water flip back, and SOFAST N-HMQC. The shown 1D spectra are from the positive projections of full 2D spectra. The ratios of signal strengths separately are scaled to the HSQC that are taken as '1' for a) the values in parenthesis are scaled to the values in Fig. 4 for direct comparison. All experiments in panel a) or b) were performed with same parameters. In panel a), sample is an  $^{15}\text{N}$ -methyl labeled MBP sample at 32 °C, and the recovery delay ( $d_1$ ) was set to 1.0 sec. In panel b), sample is a uniformly  $^{15}\text{N}/^{13}\text{C}$ -labeled protein (95 residues) run at 25 °C (25 mM potassium phosphate, pH 6.5, 1 mM  $\text{NaN}_3$ ), and the recovery delay ( $d_1$ ) was set to 0.2 sec.

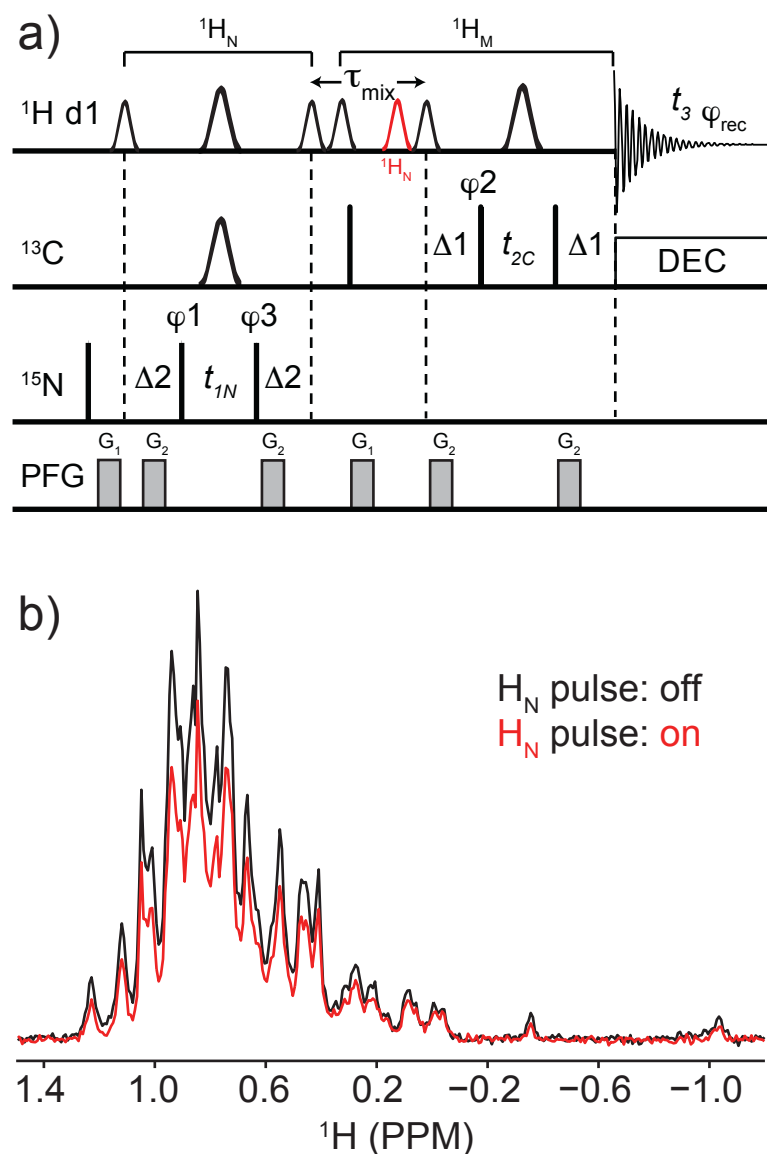

**Figure S8.** Characterization of the effect of residual  $-I_Z^X$  magnetization on signal intensity in X-YH-type experiments. The ‘X’ index refers to magnetization of protons attached to either  $C_M$  or N or  $C_{aro}$  in the case of frequency labeling of different moiety type during *first* and *second* HMQC editing in 3D HMQC-NOESY-HMQC. Panel a): pulse sequence as in Fig. 1d where ‘X’ = N. The shaped pulse in red labeled  $^1H_N$  is a test flip-down pulse that removes  $I_Z^N$  magnetization recovered during mixing time  $\tau$  (300 ms). Panel b): signal intensity with (black trace) or without (red trace) enhanced  $I_Z^N$  recovery.

## Appendix S1.

The following analysis is conducted to explain the two S/N mechanisms in the SOFAST-NOESY experiment: 1) the predominant effect of Ernst angle  $\alpha$  in 3D SOFAST N(t1)-N(t2)H<sub>N</sub>(t3) (or any X-XH type) and 2) the enhanced recovery mechanism in N(t1)-C<sub>M</sub>(t2)H<sub>M</sub>(t3) or (X-YH type) NOESY experiments.

For the <sup>1</sup>H-<sup>15</sup>N HMQC before NOE, the evolution of signal based on spin operator is given below:

$$kI_z \xrightarrow{\frac{\pi}{2}I_x} -kI_y \quad (1a)$$

$$\xrightarrow{\frac{\pi}{2}2I_zS_z} 2kS_zI_x \quad (1b)$$

$$\xrightarrow{\pm\frac{\pi}{2}S_x} \mp 2kS_yI_x \quad (1c)$$

$$\xrightarrow{\Delta\omega_1 t_1 S_z + \pi I_x} \mp 2k[S_y \cos(\Delta\omega_1 t_1) - S_x \sin(\Delta\omega_1 t_1)]I_x \quad (1d)$$

$$\xrightarrow{\frac{\pi}{2}S_x} \mp 2k[S_z \cos(\Delta\omega_1 t_1) - S_x \sin(\Delta\omega_1 t_1)]I_x \quad (1e)$$

$$\xrightarrow{\frac{\pi}{2}2I_zS_z} \mp k(2I_z)^2 I_y \cos(\Delta\omega_1 t_1) \pm 2kS_x I_x \sin(\Delta\omega_1 t_1) \quad (1f)$$

$$\xrightarrow{\frac{\pi}{2}I_x} \mp kI_z \cos(\Delta\omega_1 t_1) \pm 2kS_x I_x \sin(\Delta\omega_1 t_1) \quad (1g)$$

$$\xrightarrow{\text{gradient PFG during } \tau} \mp kI_z \cos(\Delta\omega_1 t_1) \quad (1h)$$

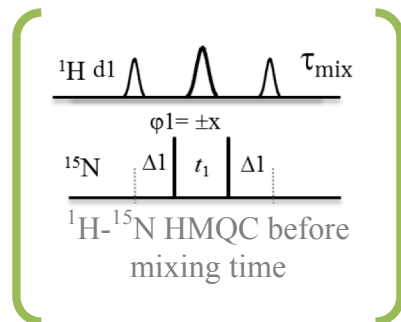

In the above derivations, <sup>1</sup>H chemical shift is not included because <sup>1</sup>H π pulse in the middle of the HMQC refocuses the <sup>1</sup>H chemical shift evolution. After the initial  $\frac{\pi}{2}$  (90°) pulse, <sup>1</sup>H polarization is changed to <sup>1</sup>H coherence  $I_y$  (eq. 1a). The scalar  $J$  coupling  $^1J_{\text{NH}}$  ( $\pi ^1J_{\text{NH}}\Delta_1 = \frac{\pi}{2}$ ) during the first  $\Delta_1$  period changes the <sup>1</sup>H's coherence  $I_y$  into antiphase coherence  $S_zI_x$  (eq. 1b). The first <sup>15</sup>N  $\frac{\pi}{2}$  pulse of phase  $\pm x$  changes the antiphase coherence into multiple quantum (zero and double quantum) coherence ( $S_yI_x$ ) (eq. 1c). Please note that different phase ( $\phi_1 = \pm x$ ) corresponds to the different sign ( $\mp$ ) of signal. During evolution  $t_1$  period, the  $^1J_{\text{NH}}$  coupling is refocused by the <sup>1</sup>H π pulse, and <sup>15</sup>N chemical shift and the <sup>1</sup>H π pulse are applied so that the coherence is frequency-labeled (eq. 1d). The second <sup>15</sup>N  $\frac{\pi}{2}$  pulse changes the first term of multiple quantum coherence  $S_yI_x$  back into an antiphase coherence  $S_zI_x$  and leaves the second term  $S_xI_x$  unchanged (eq. 1e). The scalar  $J$  coupling  $^1J_{\text{NH}}$  during the second  $\Delta_1$  period changes the antiphase coherence  $S_zI_x$  back into <sup>1</sup>H coherence  $I_y$  and leaves the second term still  $S_xI_x$  still unchanged (eq. 1f). Here please note that  $(2I_z)^2 = 1$ . Additionally,  $I_zS_z$  and  $I_xS_x$  commute ( $[I_zS_z, I_xS_x] = 0$ ), i.e.  $^1J_{\text{NH}}$  coupling does not affect multiple quantum coherence, therefore the second term  $S_xI_x$  is not changed. The second <sup>1</sup>H  $\frac{\pi}{2}$  pulse changes the <sup>1</sup>H coherence  $I_y$  back into <sup>1</sup>H  $I_z$  polarization and leaves the second term unchanged (eq. 1g). Finally gradient during mixing time  $\tau$  destroys the multiple quantum  $S_xI_x$ .

## Appendix S2. Pulse program for 2D $C_MNH_MH_N$ SFHMQC (Bruker Topspin ver. 2.1 to 3.5).

```

;SFCNHmqcpgph19: sotast simultaneous 2D 13M/13C HMQC for HN and methyl
;Youlin Xia on 05/05/2016

;SCLASS=HighRes
;SDIM=3D
;STYPE=
;SUBTYPE=
;SCOMMENT=

prosol relations=<triple>

#include <Avance.incl>
#include <Delay.incl>
#include <Grad.incl>

"p4=p3*2"
"p19=300"
"p22=p21*2"
"d11=30m"
"d13=4u"
"d14=4.0m" ;for 13C
"d15=5.2m" ;for 19N

"d0=0u"
"d10=0u"
"i10 =infi/2" ;cnst8 must be less than swC
"i10=1s/(2*cnst8)" ;cnst8 = 30 * sfo3, 30 ppm of spectral width for 19N

"l1 = (d14-(1-0.638)*(p21-p3) -p19 -d16 -14u)*2/(i10-i0)+1" ;TD(F1) <= L1
"l2 = l1"

"cnst2=5.0"
"p41=7.2/(cnst2*bf1/1000000)" /* PC9 pulse length */

"spw31=4*plw1*(pow((cnst3/90.0)*(p1/p41)/0.125,2))" /* PC9 power level */
;"sp31=pl1-20*log(2*(p1/p41)/0.125)/log(10)" /* PC9 power level */
"spoff31=0" /* PC9 offset */

"DELTA=p4"

1 d11 ze
2 d11 do:f2 do:f3
3 d1 p10:f1 p112:f2 p13:f3 BLKGRAD
10u UNBLKGRAD

"d32 = d0*2 - p3+0.637*2"
"if (d32 < 0) { d32 = 0; }"
"d33 = d10*2 - p21+0.637*2"
"if (d33 < 0) { d33 = 0; }"

"d34 = d15-d14 + 0.5*(p22-p4+d33-d32)" ;d34 > 0.5*p41
"d35 = d34-p41*0.5"
"d36 = d14-p19-d16-14u"
"d37 = d15 -d34 - p19- d16 -14u" ;d37 should be > 0
"if (d32 == 0) { d37=d36-p21; d38=d37-p22-p4;}" ;1st point

(p21 ph2):f3
p16:gp1
200u

4u cpd2:f2
(p41:sp31 ph1):f1
d35
4u do:f2

10u
p19:gp2
d16 p11:f1 p12:f2

if "d32 > 0"
{
(center (p1+0.231 ph7 d19*2 p1+0.692 ph7 d19*2 p1+1.462 ph7 d19*2 p1+1.462 ph8 d19*2 p1+0.692 ph8
d19*2 p1+0.231 ph8):f1 (d36 p3 ph5 d32 p3 ph1 d36):f2 (d37 p21 ph5 d33 p21 ph8 d37):f3)
}
else
{
(center (p1+0.231 ph7 d19*2 p1+0.692 ph7 d19*2 p1+1.462 ph7 d19*2 p1+1.462 ph8 d19*2 p1+0.692 ph8
d19*2 p1+0.231 ph8):f1 (d36 p3 ph5 d32 p3 ph1 d36):f2 (d37 p21 ph5 DELTA p22 ph2 DELTA p21 ph8 d38):f3)
}

p19:gp2
d16
10u p112:f2 p116:f3

4u cpd2:f2
d34

go=2 ph31 cpd3:f3
d11 do:f2 do:f3 mc #0 to 2
F1PH(ip5, i00 & i10)

4u BLKGRAD
exit

ph1 =0
ph2 =1
ph5 =0 2
ph7 =0
ph8 =2

ph31=0 2

```

```

;p11 : f1 channel - power level for pulse (default)
;p112: f2 channel - power level for pulse (default)
;p116: f3 channel - power level for CPD/BB decoupling
;sp31: f1 channel - power level for shaped 90 degree pulse
;spnam31: PC9_4_90.1000 with a consin-modulation
;p1 : f1 channel - 90 degree high power pulse
;p2 : f1 channel - 180 degree high power pulse
;p3 : f2 channel - 90 degree high power pulse
;p4 : f2 channel - 180 degree high power pulse
;p16: homospoil/gradient pulse [1 msec]
;p19: homospoil/gradient pulse [0.3 msec]
;p41: f1 channel - 90 degree shaped pulse
;d0 : incremented delay (F1 in 3D) [3 usec]
;d1 : relaxation delay; 1-5 * T1
;d2 : 1/((2)XH)
;d8 : mixing time
;d11: delay for disk I/O [30 msec]
;d13: short delay [4 usec]
;d16: delay for homospoil/gradient recovery
;d17: fixed delay
;d18: run time delay given by the pulse sequence
;d19: delay for binomial water suppression
; d19 = (1/(2*d)), d = distance of next null (in Hz)
;d32: run time delay given by the pulse sequence
;d33: run time delay given by the pulse sequence
;d34: run time delay given by the pulse sequence
;d35: run time delay given by the pulse sequence
;d36: run time delay given by the pulse sequence
;d37: run time delay given by the pulse sequence
;d38: run time delay given by the pulse sequence
;cnst3: flipping angle [-120]
;cnst8: 19N spectral width in Hz [=36*sfo3]
;infi: 1/SW(H) = 2 * DW(H)
;i10: 1/(2 * SW(H)) = DW(H)
;in20: 1s/(2 * cnst1) = DW(H)
;l1: maximum TD1 value allowable
;NS: 2 * n
;DS: 2*n
;td1: number of experiments in F1
;FnMODE: States-TPPI (or TPPI) in F1
;cpd2: decoupling according to sequence defined by cpdprg2
;pcpd2: f2 channel - 90 degree pulse for decoupling sequence
;cpdprg2: f2 channel [bi_garp_2p1]
;cpd3: decoupling according to sequence defined by cpdprg3
;pcpd3: f3 channel - 90 degree pulse for decoupling sequence
;cpdprg3: f3 channel [bi_garp_2p1.2]

```

```

;for z-only gradients:
;gpz1: 20%
;gpz2: 60%

```

```

;use gradient files:
;gpnam1: SMS010.100
;gpnam2: SMS010.50

```



### Appendix S3. Parameter set for 2D SOFAST $C_MNH_MH_N$ SFHMQC (Bruker Topspin ver. 2.1 to 3.5)

Wed Jul 20 15:21:34 CDT 2016

Wed Jul 20 15:21:34 CDT 2016

Pulseprogram parameters of dataset:

C:/NMR/sofast/24/pdata/1

General

```

PULPROG          sfcNhmqcgpph19
TD               1356
SWH [Hz, ppm]   13586.96      15.9789
AQ [sec]        0.0499008
RG              128
DW [μsec]       36.800
DE [μsec]       25.00
cnst2           5.000000
CNST3           120.0000000
CNST8           3101.8000488
d0 [sec]        0
D1 [sec]        0.20000000
d10 [sec]       0
d11 [sec]       0.03000000
d13 [sec]       0.00000400
d14 [sec]       0.00400000
d15 [sec]       0.00520000
D16 [sec]       0.00020000
D19 [sec]       0.00007400
D32 [sec]       0
D33 [sec]       0
D34 [sec]       0
D35 [sec]       0
D36 [sec]       0
D37 [sec]       0
D38 [sec]       0
DELTA [sec]     0.00002240
DS              16
in0 [sec]       0.00011410
in10 [sec]      0.00016120
INF1 [μsec]     228.20
l1              149
l2              149
NS              4

```

(1/3)

```

p4 [μsec]       22.40
Channel f1
SFO1 [MHz]      850.3039930
O1 [Hz, ppm]    3993.01      4.696
NUC1            1H
P1 [μsec]       10.50
p41 [μsec]      1693.52
PLW0 [W, -dBW]  0      1000.00
PLW1 [W, -dBW]  11.995    -10.79
SPNAM 31        Pc9_4_90.pw1693.5us.cos3230Hz
SPOAL31         0.500
spofffs31 [Hz]  0
spw31 [W, -dBW] 0.20985    6.78
Channel f2
SFO2 [MHz]      213.8116328
O2 [Hz, ppm]    3527.83      16.500
NUC2            13C
CPDPRG 2        bi_garp_2pl
P3 [μsec]       11.20
PCPD2 [μsec]    50.00
PLW2 [W, -dBW]  180      -22.55
PLW12 [W, -dBW] 9.0317    -9.56
PLW30 [W, -dBW] 9.0317    -9.56
PLW31 [W, -dBW] 18.021    -12.56
Channel f3
SFO3 [MHz]      86.1703179
O3 [Hz, ppm]    10166.90    118.000
NUC3            15N
CPDPRG 3        bi_garp_2pl.2
P21 [μsec]      38.00
p22 [μsec]      76.00
PCPD3 [μsec]    240.00
PLW3 [W, -dBW]  295      -24.70
PLW16 [W, -dBW] 7.3955    -8.69
PLW32 [W, -dBW] 7.3955    -8.69
PLW33 [W, -dBW] 14.756    -11.69
Gradient channel
GPNAM 1         SMSQ10.100

```

(2/3)

Wed Jul 20 15:21:34 CDT 2016

```

GPNAM 2         SMSQ10.50
GPZ1 [%]        20.00
GPZ2 [%]        60.00
P16 [μsec]      1000.00
p19 [μsec]      300.00

```

(3/3)

## Appendix S4. Pulse program for 3D $C_MN-C_MNH_MH_N$ SFHMQC-NOESY-HMQC.

```

;S(CNHmqcnoe(CNHmqc.d.NC.M-NMHHM: simultaneous 3D UNHMQC-NOESY-CNHmqc tor N.C.M(F1)-N.C.M(F2)HMM(F3)
;Youlin Xia on 05/05/2016

/*
cnst8 = 36*sfo3. cnst8 (for 15N)
TD(F2) = L1

use "split ipap 2" to split the data, enter 1 for "scaling factor for AP spectrum", and enter 0 for
"splitting in F1(0) or F2(1)"

two sets of 3D data are acquired, one is for N(t1) + C(t1) and the other is for N(t1) - C(t1)
four sub 3D spectra will be obtained:

1: Cn(t1) NOE N(t2)-Hn(t3)
2: Cn(t1) NOE Cn(t2)-Hn(t3)
3: N(t1) NOE N(t2)-Hn(t3)
4: N(t1) NOE Cn(t2)-Hn(t3)

setting zgoptns -Dhard will use hard 90 degree pulse.

*/

;CLASS=HighRes
;SDIM=3D
;STYPE=
;SUBTYPE=
;SCOMMENT=

prosol relations=<triple>

#include <Avance.incl>
#include <Delay.incl>
#include <Grad.incl>

"p4=p3+2"
"p19=500"
"p22=p21+2"
"d11=30m"
"d13=4u"
"d14=4.8m" ;for 13C
"d15=5.2m" ;for 15N

"d0=0u"
"d10=0u"
"in0 =inf1/2" ;cnst8 must be less than swC
"in10=1s/(2*cnst8)" ;cnst8 = 30 * sfo3, 30 ppm of spectral width for 15N

"d20=0u"
"d30=0u"
"in20 =inf2/2" ;cnst8 must be less than swC
"in30=1s/(2*cnst8)" ;cnst8 = 30 * sfo3, 30 ppm of spectral width for 15N

"l1 = (d14-(1-0.638)*(p21-p3) -p19 -d16 -8u)/(in10-in0)+1" ;TD(F1) = 2*L1, TD(F2) = L1
"l2 = l1"

"cnst2=5.0"
"cnst3=90"
"p41=7.2/(cnst2*bf1/1000000)" /* PC9 pulse length */

"spw29=4*plw1*(pow((p1/p41)/0.125,2)) /* PC9 power level */
;"sp29=pl1-20*log(2*(p1/p41)/0.125)/log(10)" /* PC9 power level */
"spoff29=0" /* PC9 offset */

"spw31=4*plw1*(pow((cnst3/90.0)*(p1/p41)/0.125,2)) /* PC9 power level */
;"sp31=pl1-20*log((cnst3/90.0)*(p1/p41)/0.125)/log(10)" /* PC9 power level */
"spoff31=0" /* PC9 offset */

;"if ( p61 < 250u && d1 < 0.5 ) { p61 = 250u; } else { plw6=plw2*(pow((p3/p61),2)); }"
/* 13C CPD power level */
;"plw26 = plw3*(pow((p21/pcpd3),2))" /* 15N CPD power level */

"DELTA=p4"

"TAU=d8-p21-p16*3-0.5m-10u"
"l0=0"

aqseq 312

1 d11 ze
2 d11 do:f2 do:f3
3 20u p112:f2 p13:f3 BLKGRAD
d1
if "l0 % 2 == 0 && nsdone % ns == 0"
{
rp6
}
if "l0 % 2 == 1 && nsdone % ns == 0"
{
lp6+2
}

10u UNBLKGRAD

;for t1 dimension
"d22 = d0+2 - p3+0.637+2"
"if (d22 < 0) { d22 = 0; }"
"d23 = d10+2 - p21+0.637+2"
"if (d23 < 0) { d23 = 0; }"

"d24 = d1b-d14 + 0.5*(p22-p4+d23-d22)" ;d24 > 0.5*p41
"d25 = d24-p41+0.5"
"d26 = d14-p19-d16-8u"
"d27 = d15 -d24 - p19- d16 -8u" ;d27 should be > 0
"if (d22 == 0) { d27=d26-p21; d28=d27-p22-p4;}" ;1st point

;for t2 dimension
"d32 = d20+2 - p2+0.637+2"
"if (d32 < 0) { d32 = 0; }"
"d33 = d30+2 - p21+0.637+2"
"if (d33 < 0) { d33 = 0; }"

"d34 = d15-d14 + 0.5*(p22-p4+d33-d32)" ;d34 > 0.5*p41
"d35 = d34-p41+0.5"
"d36 = d14-p19-d16-8u"
"d37 = d15 -d34 - p19- d16 -8u" ;d37 should be > 0
"if (d32 == 0) { d37=d36-p21; d38=d37-p22-p4;}" ;1st point

(p21 ph2):f3
p16:gp1
200u

;1st CNHMQC
4u cpds2:f2
#ifdef hard
4u pl0:f1
(p11:sp1 ph8):f1
4u

4u pl1:f1
(p1 ph1):f1
d24
#else
4u pl0:f1
(p41:sp29 ph1):f1
d25
#endif
4u do:f2

4u
p19:gp2
#ifdef hard
d16 pl2:f2
#else
d16 pl1:f1 pl2:f2
#endif

if "d22 > 0"
{
(center (p1+0.231 ph7 d19+2 p1+0.692 ph7 d19+2 p1+1.462 ph7 d19+2 p1+1.462 ph8 d19+2 p1+0.692 ph8
d19+2 p1+0.231 ph8):f1 (d26 p3 ph3 d22 p3 ph4 d26):f2 (d27 p21 ph3 d23 p21 ph6 d27):f3)
}
else
{
(center (p1+0.231 ph7 d19+2 p1+0.692 ph7 d19+2 p1+1.462 ph7 d19+2 p1+1.462 ph8 d19+2 p1+0.692 ph8
d19+2 p1+0.231 ph8):f1 (d26 p3 ph3 d22 p3 ph4 d26):f2 (d27 p21 ph3 DELTA p22 ph2 DELTA p21 ph6 d28):f3)
}

p19:gp2
d16
4u pl12:f2

#ifdef hard
4u cpds2:f2
d24
(p1 ph1):f1

4u pl0:f1
(p11:sp1 ph8):f1
4u
#else
4u pl0:f1 cpds2:f2
d25
(p41:sp29 ph1):f1
#endif
4u do:f2

;NOESY
TAU BLKGRAD
10u UNBLKGRAD
(p21 ph1):f3
p16+3:gp3
0.5m

;2nd CNHMQC
4u cpds2:f2
#ifdef hard
4u pl0:f1
(p11:sp1 ph8):f1
4u

4u pl1:f1

(p1 ph1):f1
d34
#else
(p41:sp31 ph1):f1
d35
#endif
4u do:f2

```

## Appendix S4. (continued)

```

4u
p19:gp2
#ifdef hard
d16 p12:f2
#else
d16 p11:f1 p12:f2
#endif

if "d32 > 0"
{
(center (p1+0.231 ph7 d19+2 p1+0.692 ph7 d19+2 p1+1.462 ph7 d19+2 p1+1.462 ph8 d19+2 p1+0.692 ph8
d19+2 p1+0.231 ph8):f1 (d36 p3 ph5 d32 p3 ph1 d36):f2 (d37 p21 ph5 d33 p21 ph9 d37):f3)
}
else
{
(center (p1+0.231 ph7 d19+2 p1+0.692 ph7 d19+2 p1+1.462 ph7 d19+2 p1+1.462 ph8 d19+2 p1+0.692 ph8
d19+2 p1+0.231 ph8):f1 (d36 p3 ph5 d32 p3 ph1 d36):f2 (d37 p21 ph5 DELTA p22 ph2 DELTA p21 ph9 d38):f3)
}

p19:gp2
d16
4u p112:f2 p116:f3

4u cpd2:f2
d34

go=2 ph31 cpd3:f3
d11 do:f2 dof3 mc #0 to 2
;for topspin2.0
;F11(iu0, 2)
;F1PH(ip3, id0 & id10)
;F2PH(rd0 & rd10 & rp3 & ip5, id20 & id30)

;for topspin3.0
F11(iu0, 2)
F1PH(caliph3, +90), caldel(d0, +in0) & caldel(d10, +in10))
F2PH(caliph5, +90), caldel(d20, +in20) & caldel(d30, +in30))

4u BLKGRAD
exit

ph1 =0
ph2 =1
ph3 =0 0 2 2
ph4 =0 0 0 0 2 2 2 2
ph6 =0 0 0 0 2 2 2 2
ph5 =0 2
ph7 =0
ph8 =2
#ifdef hard
ph9 =0
#else
ph9 =2
#endif

ph31=0 2 2 0 2 0 0 2

;p11 : f1 channel - power level for pulse (default)
;p112: f2 channel - power level for pulse (default)
;p116: f3 channel - power level for CPD/BB decoupling
;sp29: f1 channel - power level for shaped 90 degree pulse
;sp31: f1 channel - power level for shaped 90 degree pulse
;spnam29: Pc9_4_90.1000 with a consin-modulation
;spnam31: Pc9_4_90.1000 with a consin-modulation
;p1 : f1 channel - 90 degree high power pulse
;p2 : f1 channel - 180 degree high power pulse
;p3 : f2 channel - 90 degree high power pulse
;p4 : f2 channel - 180 degree high power pulse
;p16: homospoi/gradient pulse [1 msec]
;p19: homospoi/gradient pulse [0.3 msec]
;p41: f1 channel - 90 degree shaped pulse
;d0 : incremented delay (F1 in 3D) [3 usec]
;d1 : relaxation delay; 1-5 * T1
;d2 : 1/((2)XH)
;d8 : mixing time
;d11: delay for disk I/O [30 msec]
;d13: short delay [4 usec]
;d16: delay for homospoi/gradient recovery
;d17: fixed delay
;d18: run time delay given by the pulse sequence
;d19: delay for binomial water suppression
; d19 = (1/(2*d)), d = distance of next null (in Hz)
;d22: run time delay given by the pulse sequence
;d23: run time delay given by the pulse sequence
;d24: run time delay given by the pulse sequence
;d25: run time delay given by the pulse sequence
;d26: run time delay given by the pulse sequence
;d27: run time delay given by the pulse sequence
;d28: run time delay given by the pulse sequence
;d32: run time delay given by the pulse sequence
;d33: run time delay given by the pulse sequence
;d34: run time delay given by the pulse sequence
;d35: run time delay given by the pulse sequence
;d36: run time delay given by the pulse sequence
;d37: run time delay given by the pulse sequence
;d38: run time delay given by the pulse sequence

;cnst2: excitation bandwidth (ppm)
;cnst3: flipping angle (-110)
;cnst8: 15N spectral width in Hz [=36*sf03]
;inf1: 1/5W(H) = 2 * DW(H)
;inf0: 1/(2 * 5W(H)) = DW(H)
;in28: Is/(2 * cnst1) = DW(H)
;l1: maximum T02 value allowable
;NS: 8*n
;DS: 8*n
;td1: number of experiments in F1 * 2
;td2: number of experiments in F2
;FnMODE: States-TPPI (or TPPI) in F1 & F2
;cpd2: decoupling according to sequence defined by cpdprg2
;cpd2: f2 channel - 90 degree pulse for decoupling sequence
;cpdprg2: f2 channel [b1_garp_2pl]
;cpd3: decoupling according to sequence defined by cpdprg3
;cpd3: f3 channel - 90 degree pulse for decoupling sequence
;cpdprg3: f3 channel [b1_garp_2pl.2]

;for z-only gradients:
;gpz1: 25%
;gpz2: 35%
;gpz3: 30%

;use gradient files:
;gpnam1: SMS010.100
;gpnam2: SMS010.50
;gpnam3: SMS010.100

```

### Appendix S5. Parameter set for 3D C<sub>M</sub>N-C<sub>M</sub>NH<sub>M</sub>H<sub>N</sub> SFHMQC-NOESY-HMQC.

Wed Jul 20 15:25:55 CDT 2016

Wed Jul 20 15:25:55 CDT 2016

Pulseprogram parameters of dataset:

C:/NMR/sofast/20/pdata/1

General

PULPROG sfCNhmqcnoeCNhmqc3d.NCm-NCmHnHm

TD 2048

SWH [Hz, ppm] 13586.96 15.9789

AQ [sec] 0.0753664

RG 128

DW [μsec] 36.800

DE [μsec] 25.00

cnst2 5.000000

cnst3 90.000000

CNST8 3101.8000488

d0 [sec] 0

D1 [sec] 0.20000000

D8 [sec] 0.30000001

d10 [sec] 0

d11 [sec] 0.03000000

d13 [sec] 0.00000400

d14 [sec] 0.00400000

d15 [sec] 0.00520000

D16 [sec] 0.00020000

D19 [sec] 0.00007400

d20 [sec] 0

D22 [sec] 0

D23 [sec] 0

D24 [sec] 0

D25 [sec] 0

D26 [sec] 0

D27 [sec] 0

D28 [sec] 0

d30 [sec] 0

D32 [sec] 0

D33 [sec] 0

D34 [sec] 0

D35 [sec] 0

D36 [sec] 0

D37 [sec] 0

D38 [sec] 0

DELTA [sec] 0.00002240

DS 16

in0 [sec] 0.00011410

in10 [sec] 0.00016120

in20 [sec] 0.00011410

in30 [sec] 0.00016120

INF1 [μsec] 228.20

INF2 [μsec] 228.20

l0 0

l1 140

l2 140

NS 8

p4 [μsec] 22.40

TAU [sec] 0.29645202

ZGOPTNS

Channel f1

SFO1 [MHz] 850.3039930

O1 [Hz, ppm] 3993.01 4.696

NUC1 1H

P1 [μsec] 10.60

p41 [μsec] 1693.52

PLW0 [W, -dBW] 0 1000.00

PLW1 [W, -dBW] 12 -10.79

SPNAM 29 Pc9\_4\_90.pw1693.5us.cos3230Hz

SPOAL29 0.500

spoffs29 [Hz] 0

spw29 [W, -dBW] 0.12035 9.20

SPNAM 31 Pc9\_4\_90.pw1693.5us.cos3230Hz

SPOAL31 0.500

spoffs31 [Hz] 0

spw31 [W, -dBW] 0.12035 9.20

Channel f2

SFO2 [MHz] 213.8116328

O2 [Hz, ppm] 3527.83 16.500

NUC2 13C

CPDPRG 2 bi\_garp\_2p1

(1/3)

(2/3)

## Appendix S5. (continued)

Wed Jul 20 15:25:55 CDT 2016

|                  |               |         |
|------------------|---------------|---------|
| P3 [μsec]        | 11.20         |         |
| PCPD2 [μsec]     | 50.00         |         |
| PLW2 [W, -dBW]   | 180           | -22.55  |
| PLW12 [W, -dBW]  | 9.0317        | -9.56   |
| PLW30 [W, -dBW]  | 9.0317        | -9.56   |
| PLW31 [W, -dBW]  | 18.021        | -12.56  |
| Channel f3       |               |         |
| SFO3 [MHz]       | 86.1703179    |         |
| O3 [Hz, ppm]     | 10166.90      | 118.000 |
| NUC3             | 15N           |         |
| CPDPRG 3         | bi_garp_2p1.2 |         |
| P21 [μsec]       | 38.00         |         |
| p22 [μsec]       | 76.00         |         |
| PCPD3 [μsec]     | 240.00        |         |
| PLW3 [W, -dBW]   | 295           | -24.70  |
| PLW16 [W, -dBW]  | 7.3955        | -8.69   |
| PLW32 [W, -dBW]  | 7.3955        | -8.69   |
| PLW33 [W, -dBW]  | 14.756        | -11.69  |
| Gradient channel |               |         |
| GPNAM 1          | SMSQ10.100    |         |
| GPNAM 2          | SMSQ10.50     |         |
| GPNAM 3          | SMSQ10.100    |         |
| GPZ1 [%]         | 25.00         |         |
| GPZ2 [%]         | 35.00         |         |
| GPZ3 [%]         | 30.00         |         |
| P16 [μsec]       | 1000.00       |         |
| p19 [μsec]       | 500.00        |         |

(3/3)

## Appendix S6. Pulse program for 3D C<sub>Aro</sub>-C<sub>M</sub>H<sub>M</sub> SFHMQC-NOESY-HMQC (Topspin ver. 2.1 to 3.5).

```

;sfhmqcnoesyhmqcjd.ca-CmM: 3D HMQC-NOESY-HMQC for Carot(F1)-Cm(F2)Hm(F3)
;H-C(t1)-H -NOE -H-C(t2)-H(t3): C(t1) for aromatic 13C, C(t2) and H(t3) are for methyl
;Youlin Xia on 05/05/2016

prosol relations=<triple>

#include <Advance.incl>
#include <Delay.incl>
#include <Grad.incl>

"d11=30m"

"i10 =inf1/2"
"i10=inf2/2"
"d0=0u"
"d10=0u"

"TAU=d8-p3-p16-0.5m-5u"

"d14=1s/(cnst4+2)" ;cnst4=125
"d15=1s/(cnst5+2)" ;cnst5=160

"p41=7.2/(cnst2+bf1/1000000)" /* PC9 pulse length */
"p42=4.875/(cnst2+bf1/1000000)" /* REBURP pulse length */

"spw25=plw1*(pow((p1/p41)/0.125,2))" /* PC9 power level */
"spoff25=bf1*(cnst2/1000000)-o1" /* PC9 offset */

"spw26=plw1*(pow((p1+2/p42)/0.0798,2))" /* REBURP power level */
"spoff26=spoff25" /* REBURP offset */

"spw27=plw1*(pow((p1*(cnst3/90)/p41)/0.125,2))"
"spoff27=bf1*(cnst1/1000000)-o1" /* PC9 offset */

"spw28=plw1*(pow((p1+2/p42)/0.0798,2))"
"spoff28=spoff27" /* PC9 offset */

"DELTA1=d14-p16-d16-p41+0.5"
"DELTA2=p41+0.5-de-4u"

"DELTA3=d15-p16-d16-p41+0.5"
"DELTA4=p41+0.5"

aqqeq 321

1 d11 ze
2 d11 de:f2
3 d1 p10:f1 p12:f2

10u UNBLKGRAD

5u fq=cnst22(bf ppm):f2 ;set 13C to center of 13C freq of aromac1 ring [125ppm]
p3 ph1:f2
p16:gp3
200u

"d20 = d0+2 - p3+0.637*2"
"if (d20 < 0) { d20 = 0; }"

"d21 = d10+2 - p3+0.637*2"
"if (d21 < 0) { d21 = 0; }"

;HMOC1
(p41:sp25 ph1):f1
p16:gp1
d16

(center (p42:sp26 ph5):f1 (DELTA3 p3 ph3 d20 p3 ph4 DELTA3):f2 )

p16:gp1
d16

DELTA4 p11:f1
(p1 ph1):f1
;(p41:sp25 ph1):f1

;mixing
TAU
5u fq=0:f2 ;return back to o2p [16ppm]
p3 ph1:f2
p16:gp3
0.5m p10:f1

;HMOC2
(p41:sp27 ph1):f1
p16:gp1
d16

(center (p42:sp28 ph8):f1 (DELTA1 p3 ph6 d21 p3 ph7 DELTA1):f2 )

DELTA2
p16:gp1
d16 p112:f2
4u BLKGRAD

gou=1 ph1 cpd2:1
d11 do:f2 mc #0 to 2
;for topspin2.0
F1PH(rd10 & rp6 & ip3, id0)
F2PH(ip6, id10)

;for topspin3.0
;F1PH(calph(ph3, +90), caldel(d0, +in0))
;F2PH(calph(ph6, +90), caldel(d10, +in10))
exit

ph1 =0
ph2 =1
ph3 =0 2
ph4 =0 0 2 2
ph5 =0 0 0 1 1 1 1
ph6 =0 0 0 0 0 0 2 2 2 2 2 2 2 2
ph7 =0
ph8 =0
ph31=0 2 2 0 2 0 2 2 0 2 2 0 2 2 0

;p11 : f1 channel - power level for pulse (default)
;p12 : f2 channel - power level for pulse (default)
;p112: f2 channel - power level for CPD/BB decoupling
;sp25: f1 channel - power level for shaped 90 degree pulse
;sp26: f1 channel - power level for shaped 180 degree pulse
;sp27: f1 channel - power level for shaped 90 degree pulse
;sp28: f1 channel - power level for shaped 180 degree pulse
;spnam25: PC9_4_90.1000
;spnam26: Reburp.1000
;spnam27: PC9_4_90.1000
;spnam28: Reburp.1000
;p1 : f1 channel - 90 degree high power pulse
;p2 : f1 channel - 180 degree high power pulse
;p3 : f2 channel - 90 degree high power pulse
;p4 : f2 channel - 180 degree high power pulse
;p16: homospoi/gradient pulse [1 msec]
;p41: f1 channel - 90 degree shaped pulse
;p42: f1 channel - 180 degree shaped pulse
;d0 : incremented delay (F1 in 3D) [3 usec]
;d1 : relaxation delay; 1-5 * T1
;d2 : 1/(2)XH
;d8 : mixing time
;d10: incremented delay (F2 in 3D) [3 usec]
;d11: delay for disk I/O [30 msec]
;d14: 1/(2)XCH
;d16: delay for homospoi/gradient recovery [4.0 msec]
;d20: run time delay given by the pulse sequence
;d21: run time delay given by the pulse sequence
;cnst1: center of methyl 1H in ppm [0.9]
;cnst2: 1H excitation bandwidth [5]
;cnst3: flipping angle of the 2nd HMOC[110]
;cnst4: 13CH of methyl [125]
;cnst5: 13CH of aromatic ring [160]
;cnst21: center of aromatic 1H chemical shifts [8.5]
;cnst22: center of aromatic 13C chemical shifts [125]
;o1p: center of methyl 1H chemical shifts [4.7]
;o2p: center of methyl 13C chemical shifts [16]

;inf1: 1/SW(H) = 2 * DW(H)
;inf2: 1/SW(X) = 2 * DW(X)
;inf0: 1/(2 * SW(H)) = DW(H)
;nd0: 2
;inf10: 1/(2 * SW(X)) = DW(X)
;nd10: 2
;NS: 8 * n
;DS: 16
;td1: number of experiments in F1
;td2: number of experiments in F2
;FnMODE: States-TPPI (or TPPI) in F1
;FnMODE: States-TPPI (or TPPI) in F2
;cpd2: decoupling according to sequence defined by cpdprg2
;pcpd2: f2 channel - 90 degree pulse for decoupling sequence
;cpdprg2: f2 channel - bi_garp_pl

;for z-only gradients:
;gp21: 25%
;gp23: 30%

;use gradient files:
;gpnam1: SMSQ10.100
;gpnam3: SMSQ10.100

```

**Appendix S7.** Parameter set for 3D C<sub>Aro</sub>-C<sub>M</sub>H<sub>M</sub> SFHMQC-NOESY-HMQC (Bruker Topspin ver. 2.1 to 3.5).

Wed Jul 20 15:27:25 CDT 2016

Wed Jul 20 15:27:25 CDT 2016

Pulseprogram parameters of dataset:

C:/NMR/sofast/109/pdata/1

General

```

PULPROG          sfhmqcnoesyhmqc3d.am.CCH
TD               2048
SWH [Hz, ppm]   13736.26      16.1545
AQ [sec]        0.0745472
RG              90.5
DW [µsec]       36.400
DE [µsec]       25.00
CNST1           1.0000000
CNST2           4.0000000
CNST4           125.0000000
CNST5           160.0000000
CNST21          7.5000000
d0 [sec]        0
D1 [sec]        1.0000000
D8 [sec]        0.30000001
d10 [sec]       0
d11 [sec]       0.03000000
D16 [sec]       0.00020000
D20 [sec]       0
D21 [sec]       0.00180000
DELTA1 [sec]    0.00174155
DELTA2 [sec]    0.00102945
DELTA3 [sec]    0.00086655
DELTA4 [sec]    0.00105845
DS              32
in0 [sec]       0.00009350
in10 [sec]      0.00011690
INF1 [µsec]     187.00
INF2 [µsec]     233.80
NS              16
P1 [µsec]       14.50
TAU [sec]       0.29848382
dCH [sec]       0.00400000
dCH2 [sec]      0.00312500

```

(1/3)

```

Channel f1
SFO1 [MHz]      850.3039982
O1 [Hz, ppm]   3998.21      4.702
NUC1            1H
p41 [µsec]     2116.90
p42 [µsec]     1433.32
PLW0 [W, -dBW] 0      1000.00
PLW1 [W, -dBW] 12     -10.79
SPNAM 25       Pc9_4_90.1000
SPOAL25        0.500
spoffs25 [Hz]  2379.04
spw25 [W, -dBW] 0.036757  14.35
SPNAM 26       Reburp.1000
SPOAL26        0.500
spoffs26 [Hz]  2379.04
spw26 [W, -dBW] 0.74844   1.26
SPNAM 27       Pc9_4_90.1000
SPOAL27        0.500
spoffs27 [Hz]  -3147.91
spw27 [W, -dBW] 0.036757  14.35
SPNAM 28       Reburp.1000
SPOAL28        0.500
spoffs28 [Hz]  -3147.91
spw28 [W, -dBW] 0.74844   1.26
Channel f2
SFO2 [MHz]      213.8118466
O2 [Hz, ppm]   3741.64      17.500
NUC2            13C
CNST22          122.0000000
CPDPRG 2       bi_garp_2pl
P3 [µsec]      11.20
PCPD2 [µsec]   50.00
PLW2 [W, -dBW] 180     -22.55
PLW12 [W, -dBW] 9.0317  -9.56
PLW30 [W, -dBW] 9.0317  -9.56
PLW31 [W, -dBW] 36.127  -15.58
Gradient channel
GPNAM 1        SMSQ10.100

```

(2/3)

Wed Jul 20 15:27:25 CDT 2016

```

GPNAM 3        SMSQ10.100
GPZ1 [%]       11.00
GPZ3 [%]       30.00
P16 [µsec]     1000.00

```

(3/3)

## Appendix S8. Pulse program for 3D $H_N H_{Aro}-C_M H_M$ SFNOESY-HMQC (Bruker Topspin ver. 2.1 to 3.5).

```

;stnoesyhmqc3d.HnHa-LmHm: NOESY-HMUL for HnHa(F3)-Lm(F2)Hm(F3)
;H(t1) -NOE -H-C(t2)-H(t3): H(t1) for both amide and aromatic 1H, C(t2) and H(t3) are for methyl
;YouLin Xia on 05/05/2016

;note: if setting cnst21 to 1 and cnst22 to 16, the pulse program can also apply for methyl-methyl NOESY

;CLASS=HighRes
;SDIM=30
;STYPE=
;SUBTYPE=
;COMMENT=

prosol relations=<triple>

#include <Avance.incl>
#include <Delay.incl>
#include <Grad.incl>

"d11=30m"

"in0 =inf1/2"
"in10=inf2/2"
"d0=3u"
"d10=0u"
"d14=1s/(cnst4*2)" ;cnst4=125

"TAU=d0-p3-p16-0.5m"

"p41=7.2/(cnst2*bf1/1000000)" /* PC9 pulse length */
"p42=4.875/(cnst2*bf1/1000000)" /* REBURP pulse length */

"spw25=plw1*(pow((p1+p41)/0.125,2))"
"spoff25=0" /* PC9 offset */

"spw26=plw1*(pow((p1+2/p42)/0.0798,2))"
"spoff26=0" /* PC9 offset */

"spw27=plw1*(pow((p1*(cnst3/90)/p41)/0.125,2))"
"spoff27=bf1*(cnst1/1000000)-o1" /* PC9 offset */

"spw28=plw1*(pow((p1+2/p42)/0.0798,2))"
"spoff28=spoff27" /* PC9 offset */

"DELTA1=d14-p16-d16-p41+0.5"
"DELTA2=p41+0.5-de-4u"

aaseq 321

1 d11 ze
2 d11 do:f2
3 d1 pl0:f1 pl3:f3

10u UNBLKGRAD

"d21 = d10+2 - p3*0.637*2"
"if (d21 < 0) { d21 = 0; }"

;NOESY
p16:gp3
d16

4u fq=cnst21(bf ppm):f1
4u fq=cnst22(bf ppm):f2

4u pl12:f2
5u cpd5:f2
(p41:sp25 ph3):f1
d0
(p22 ph1):f3
d0
(p42:sp26 ph5):f1
3u
(p22 ph1):f3
3u
(p41:sp25 ph4):f1
5u do:f2
4u fq=0:f2

;mixing
TAU p12:f2 fq=0:f1 ;0 Hz offset
(p3 ph1):f2
p16:gp3
0.5m

;HMQC
(p41:sp27 ph1):f1
p16:gp1
d16

(center (p42:sp28 ph8):f1 (DELTA1 p3 ph6 d21 p3 ph7 DELTA1):f2 )

DELTA2
p16:gp1
d16 pl12:f2
4u BLKGRAD

go=2 ph31 cpd2:f2
d11 do:f2 mc #0 to 2
;for topspin2.0
F1PH(rdi0 & rp6 & ip3, id0)
F2PH(ip6, id10)

;for topspin3.0
;F1PH(caliph(ph3, +90), caldel(d0, +in0))
;F2PH(caliph(ph6, +90), caldel(d10, +in10))
exit

ph1=0
ph2=1
ph3=0 2
ph4=0
ph5=0 0 0 1 1 1 1
ph6=0 0 2 2
ph7=0
ph8=0
ph31=0 2 2 0 2 0 2

;p1: f1 channel - power level for pulse (default)
;p2: f2 channel - power level for pulse (default)
;p12: f2 channel - power level for CPD/BB decoupling
;sp25: f1 channel - power level for shaped 90 degree pulse
;sp26: f1 channel - power level for shaped 180 degree pulse
;sp27: f1 channel - power level for shaped 90 degree pulse
;sp28: f1 channel - power level for shaped 180 degree pulse
;spnam25: PC9_4_90.1000
;spnam26: Reburp.1000
;spnam27: PC9_4_90.1000
;spnam28: Reburp.1000
;p1: f1 channel - 90 degree high power pulse
;p2: f1 channel - 180 degree high power pulse
;p3: f2 channel - 90 degree high power pulse
;p4: f2 channel - 180 degree high power pulse
;p16: homospoil/gradient pulse [1 msec]
;p41: f1 channel - 90 degree shaped pulse
;p42: f1 channel - 180 degree shaped pulse
;d0: incremented delay (F1 in 3D) [3 usec]
;d1: relaxation delay; 1-5 * T1
;d2: 1/(2)(XH)
;d8: mixing time
;d10: incremented delay (F2 in 3D) [3 usec]
;d11: delay for disk I/O [30 msec]
;d14: 1/(2)(CH) [3.7 msec]
;d16: delay for homospoil/gradient recovery
;d21: run time delay given by the pulse sequence
;cnst1: center of methyl 1H in ppm [0.9]
;cnst2: 1H excitation bandwidth [5]
;cnst3: flipping angle of the 2nd HMQC[110]
;cnst4: 1JCH of methyl [125]
;cnst5: 1JCH of aromatic ring [160]
;cnst21: center of aromatic 1H chemical shifts [8.5]
;cnst22: center of aromatic 13C chemical shifts [125]
;o1p: center of methyl 1H chemical shifts [1]
;o2p: center of methyl 13C chemical shifts [16]

;inf1: 1/SW(H) = 2 * DW(H)
;inf2: 1/SW(X) = 2 * DW(X)
;in0: 1/(2 * SW(H)) = DW(H)
;nd0: 2
;in10: 1/(2 * SW(X)) = DW(X)
;nd10: 2
;NS: 4 * n
;DS: 8
;td1: number of experiments in F1
;td2: number of experiments in F2
;FnMODE: States-TPPI (or TPPI) in F1
;FnMODE: States-TPPI (or TPPI) in F2
;cpd2: decoupling according to sequence defined by cpdprg2
;pcpd2: f2 channel - 90 degree pulse for decoupling sequence
;cpdprg2: f2 channel - bi_garp_128

;for z-only gradients:
;gpz1: 25%
;gpz3: 30%

;use gradient files:
;gpnam1: SMS010.100
;gpnam3: SMS010.100

```



Appendix S9. Parameter set for 3D  $H_{NH_{Aro}}-C_{MH_M}$  SFNOESY-HMQC.

Wed Jul 20 15:34:13 CDT 2016

Pulseprogram parameters of dataset:

C:/NMR/sofast/308/pdata/1

General

```

PULPROG          sfnoesyhmqc3d.Am.HCH
TD               1356
SWH [Hz, ppm]   13586.96      15.9789
AQ [sec]        0.0499008
RG              90.5
DW [µsec]       36.800
DE [µsec]       25.00
CNST1           1.0000000
CNST2           4.0000000
CNST3           90.0000000
CNST4          125.0000000
d0 [sec]        0.00000300
D1 [sec]        0.20000000
D8 [sec]        0.30000001
d10 [sec]       0
d11 [sec]       0.03000000
d14 [sec]       0.00400000
D16 [sec]       0.00020000
D21 [sec]       0.00180000
DELTA1 [sec]    0.00174155
DELTA2 [sec]    0.00102945
DS              8
in0 [sec]       0.00013070
in10 [sec]      0.00011690
INF1 [µsec]     261.40
INF2 [µsec]     233.80
NS              8
P1 [µsec]       14.50
TAU [sec]       0.29848883
Channel f1
SFO1 [MHz]      850.3039982
O1 [Hz, ppm]    3998.21      4.702
NUC1            1H
CNST21          8.6000004

```

(1/3)

Wed Jul 20 15:34:13 CDT 2016

```

p41 [µsec]      2116.90
p42 [µsec]      1433.32
PLW0 [W, -dBW] 0           1000.00
PLW1 [W, -dBW] 12          -10.79
SPNAM 25        Pc9_4_90.1000
SPOAL25         0.500
spoffs25 [Hz]  0
spw25 [W, -dBW] 0.036033   14.43
SPNAM 26        Reburp.1000
SPOAL26         0.500
spoffs26 [Hz]  0
spw26 [W, -dBW] 0.77141    1.13
SPNAM 27        Pc9_4_90.1000
SPOAL27         0.500
spoffs27 [Hz]  -3147.91
spw27 [W, -dBW] 0.036033   14.43
SPNAM 28        Reburp.1000
SPOAL28         0.500
spoffs28 [Hz]  -3147.91
spw28 [W, -dBW] 0.77141    1.13
Channel f2
SFO2 [MHz]      213.8118466
O2 [Hz, ppm]    3741.64     17.500
NUC2            13C
CNST22          122.0000000
CPDPRG 2        bi_garp_2pl
CPDPRG 5        garp
P3 [µsec]       11.20
PCPD2 [µsec]    50.00
PLW2 [W, -dBW] 180         -22.55
PLW12 [W, -dBW] 9.0317     -9.56
PLW30 [W, -dBW] 9.0317     -9.56
PLW31 [W, -dBW] 36.127     -15.58
Channel f3
SFO3 [MHz]      86.1703179
O3 [Hz, ppm]    10166.90    118.000
NUC3            15N
P22 [µsec]      64.00

```

(2/3)

Wed Jul 20 15:34:13 CDT 2016

```

PLW3 [W, -dBW] 250         -23.98
Gradient channel
GPNAM 1         SMSQ10.100
GPNAM 3         SMSQ10.100
GPZ1 [%]        11.00
GPZ3 [%]        30.00
P16 [µsec]      1000.00

```

(3/3)

## Appendix S10. Pulse program for 3D $H_M-C_MH_M$ SFNOESY-HMQC.

```

;stnoesyhmqc;g.Ho-LMH: sotast 3D NOESY-HMUL for HM(F1)-LM(F2)HM(F3)
;H(t1) -NOE -H-C(t2)-H(t3): H(t1) for methyl 1H, C(t2) and H(t3) are for methyl
;YouLin Xia on 05/05/2016

;CLASS=HighRes
;SDIM=3D
;STYPE=
;SUBTYPE=
;COMMENT=

prosol relations=<triple>

#include <Avance.incl>
#include <Delay.incl>
#include <Grad.incl>

"d11=30m"

"i0 = inf1/2"
"i10 = inf2/2"
"d0=3u"
"d10=0u"
"d14=1s/(cnst4*2)" ;cnst4=125

"TAU=d8-p3-p16-0.5m"

"p41=7.2/(cnst2*bf1/1000000)" /* PC9 pulse length */
"p42=4.875/(cnst2*bf1/1000000)" /* REBURP pulse length */

"spw25=plw1*(pow((p1/p41)/0.125,2))"
"spoff25=0" /* PC9 offset */

"spw26=plw1*(pow((p1+2/p42)/0.0798,2))"
"spoff26=0" /* PC9 offset */

"spw27=plw1*(pow((p1*(cnst3/90)/p41)/0.125,2))"
"spoff27=bf1*(cnst1/1000000)-01" /* PC9 offset */

"spw28=plw1*(pow((p1+2/p42)/0.0798,2))"
"spoff28=spoff27" /* PC9 offset */

"DELTA1=d14-p16-d16-p41+0.5"
"DELTA2=p41+0.5-de-4u"

aqseq 321

1 d11 ze
2 d11 do:f2
3 d1 pl0:f1 pl2:f2

10u UNBLKGRAD

; (p3 ph1):f2
p16:gp3=1.2
200u

"d21 = d10+2 - p3*0.637*2"
"if (d21 < 0) { d21 = 0; }"

;NOESY
4u fq=cnst1(bf ppm):f1

# ifdef cpd
4u pl12:f2
5u cpd5:f2
(p41:sp25 ph3):f1
d0
d0
(p42:sp26 ph5):f1
6u
(p41:sp25 ph4):f1
5u do:f2
4u pl2:f2
# else
(p41:sp25 ph3):f1
d0
(p4 ph1):f2
d0
(p42:sp26 ph5):f1
3u
(p4 ph1):f2
3u
(p41:sp25 ph4):f1
# endif
4u

;mixing
TAU fq=0:f1 ;0 Hz offset
(p3 ph1):f2
p16:gp3
0.5m

;HMQC
(p41:sp27 ph1):f1
p16:gp1
d16

(center (p42:sp28 ph8):f1 (DELTA1 p3 ph6 d21 p3 ph7 DELTA1):f2 )

DELTA2
p16:gp1
d16 pl12:f2
4u BLKGRAD

g0=2 ph31 cpd2:f2
d11 do:f2 mc #0 to 2
;for topspin2.0
F1PH(rd10 & rp6 & ip3, id0)
F2PH(ip6, id10)

;for topspin3.0
;F1PH(caliph(ph3, +90), caldel(d0, +in0))
;F2PH(caliph(ph6, +90), caldel(d10, +in10))
exit

ph1 =0
ph2 =1
ph3 =0 2
ph4 =0
ph5 =0 0 0 1 1 1 1
ph6 =0 0 2 2
ph7 =0
ph8 =0
ph31=0 2 2 0 2 0 2

;p11 : f1 channel - power level for pulse (default)
;p12 : f2 channel - power level for pulse (default)
;p12: f2 channel - power level for CPD/BB decoupling
;sp25: f1 channel - power level for shaped 90 degree pulse
;sp26: f1 channel - power level for shaped 180 degree pulse
;sp27: f1 channel - power level for shaped 90 degree pulse
;sp28: f1 channel - power level for shaped 180 degree pulse
;spnam25: PC9_4_90.1000
;spnam26: Reburp.1000
;spnam27: PC9_4_90.1000
;spnam28: Reburp.1000
;p1 : f1 channel - 90 degree high power pulse
;p2 : f1 channel - 180 degree high power pulse
;p3 : f2 channel - 90 degree high power pulse
;p4 : f2 channel - 180 degree high power pulse
;p16: homospoil/gradient pulse [1 msec]
;p41: f1 channel - 90 degree shaped pulse
;p42: f1 channel - 180 degree shaped pulse
;d0 : incremented delay (F1 in 3D) [3 usec]
;d1 : relaxation delay; 1-5 * T1
;d2 : 1/(2)(2)XH
;d8 : mixing time
;d10: incremented delay (F2 in 3D) [3 usec]
;d11: delay for disk I/O [30 msec]
;d14: 1/(2)CH [3.7 msec]
;d16: delay for homospoil/gradient recovery
;d21: run time delay given by the pulse sequence
;cnst1: center of methyl 1H in ppm [0.9]
;cnst2: 1H excitation bandwidth [5]
;cnst3: flipping angle of the 2nd HMQC[110]
;cnst4: 13CH of methyl [125]
;cnst5: 13CH of aromatic ring [100]
;o1p: center of methyl 1H chemical shifts [4.7]
;o2p: center of methyl 13C chemical shifts [16]

;inf1: 1/SW(H) = 2 * DW(H)
;inf2: 1/SW(X) = 2 * DW(X)
;in0: 1/(2 * SW(H)) = DW(H)
;rd0: 2
;in10: 1/(2 * SW(X)) = DW(X)
;rd10: 2
;NS: 4 * n
;DS: 8
;t01: number of experiments in F1
;t02: number of experiments in F2
;FmMODE: States-TPPI (or TPPI) in F1
;FmMODE: States-TPPI (or TPPI) in F2
;cpd2: decoupling according to sequence defined by cpdprg2
;pcpd2: f2 channel - 90 degree pulse for decoupling sequence
;cpdprg2: f2 channel - bi_garp_2pl

;for z-only gradients:
;gp1: 25%
;gp2: 30%

;use gradient files:
;gpnam1: SMS010.100
;gpnam3: SMS010.100

```

Appendix S11. Parameter set for 3D H<sub>M</sub>-C<sub>M</sub>H<sub>M</sub> NOESY-HMQC.

Wed Jul 20 15:30:02 CDT 2016

Wed Jul 20 15:30:02 CDT 2016

Pulseprogram parameters of dataset:

C:/NMR/sofast/220/pdata/1

General

```

PULPROG          sfnoesyhmqc3d.mm.HCH
TD               1356
SWH [Hz, ppm]   13586.96      15.9789
AQ [sec]        0.0499008
RG              90.5
DW [μsec]       36.800
DE [μsec]       25.00
CNST2           4.0000000
CNST3           110.0000000
CNST4           125.0000000
d0 [sec]        0.00000300
D1 [sec]        0.20000000
D8 [sec]        0.30000001
d10 [sec]       0
d11 [sec]       0.03000000
d14 [sec]       0.00400000
D16 [sec]       0.00020000
D21 [sec]       0.00180000
DELTA1 [sec]    0.00174155
DELTA2 [sec]    0.00102945
DS              8
in0 [sec]       0.00016800
in10 [sec]      0.00011690
INF1 [μsec]     336.00
INF2 [μsec]     233.80
NS              8
P1 [μsec]       14.50
TAU [sec]       0.29848883
ZGOPTNS
Channel f1
SFO1 [MHz]      850.3039982
O1 [Hz, ppm]    3998.21      4.702
NUC1            1H
CNST1           1.0000000

```

```

p41 [μsec]      2116.90
p42 [μsec]      1433.32
PLW0 [W, -dBW] 0          1000.00
PLW1 [W, -dBW] 12         -10.79
SPNAM 25        Pc9_4_90.1000
SPOAL25         0.500
spoffs25 [Hz]  0
spw25 [W, -dBW] 0.036033   14.43
SPNAM 26        Reburp.1000
SPOAL26         0.500
spoffs26 [Hz]  0
spw26 [W, -dBW] 0.77141    1.13
SPNAM 27        Pc9_4_90.1000
SPOAL27         0.500
spoffs27 [Hz]  -3147.91
spw27 [W, -dBW] 0.053827   12.69
SPNAM 28        Reburp.1000
SPOAL28         0.500
spoffs28 [Hz]  -3147.91
spw28 [W, -dBW] 0.77141    1.13
Channel f2
SFO2 [MHz]      213.8118466
O2 [Hz, ppm]    3741.64     17.500
NUC2            13C
CPDPRG 2        bi_garp_2p1
P3 [μsec]       11.20
P4 [μsec]       22.40
PCPD2 [μsec]    50.00
PLW2 [W, -dBW] 180         -22.55
PLW12 [W, -dBW] 9.0317     -9.56
PLW30 [W, -dBW] 9.0317     -9.56
PLW31 [W, -dBW] 36.127     -15.58
Gradient channel
GPNAM 1         SMSQ10.100
GPNAM 3         SMSQ10.100
GPZ1 [%]        11.00
GPZ3 [%]        30.00
P16 [μsec]      1000.00

```

(1/2)

(2/2)

## References

- Geen H, Freeman R (1991) Band-Selective Radiofrequency Pulses *J Magn Reson* 93:93-141 doi:Doi 10.1016/0022-2364(91)90034-Q
- Hwang TL, van Zijl PCM, Garwood M (1997) Broadband adiabatic refocusing without phase distortion *J Magn Reson* 124:250-254 doi:DOI 10.1006/jmre.1996.1049
- Kupce E, Freeman R (1994) Wide-Band Excitation with Polychromatic Pulses *J Magn Reson Ser A* 108:268-273 doi:DOI 10.1006/jmra.1994.1123
- Liu ML, Mao XA, Ye CH, Huang H, Nicholson JK, Lindon JC (1998) Improved WATERGATE pulse sequences for solvent suppression in NMR spectroscopy *J Magn Reson* 132:125-129 doi:DOI 10.1006/jmre.1998.1405
- Mccoy MA, Mueller L (1992) Selective Shaped Pulse Decoupling in Nmr - Homonuclear [<sup>13</sup>C]Carbonyl Decoupling *J Am Chem Soc* 114:2108-2112 doi:DOI 10.1021/ja00032a026
- Schanda P, Kupce E, Brutscher B (2005) SOFAST-HMQC experiments for recording two-dimensional heteronuclear correlation spectra of proteins within a few seconds *J Biomol NMR* 33:199-211 doi:10.1007/s10858-005-4425-x
- Schulte-Herbruggen T, Sorensen OW (2000) Clean TROSY: Compensation for relaxation-induced artifacts *J Magn Reson* 144:123-128 doi:DOI 10.1006/jmre.2000.2020
- Sklenar V, Piotto M, Leppik R, Saudek V (1993) Gradient-Tailored Water Suppression for H-1-N-15 Hsqc Experiments Optimized to Retain Full Sensitivity *J Magn Reson Ser A* 102:241-245 doi:DOI 10.1006/jmra.1993.1098
- Solyom Z, Schwarten M, Geist L, Konrat R, Willbold D, Brutscher B (2013) BEST-TROSY experiments for time-efficient sequential resonance assignment of large disordered proteins *J Biomol NMR* 55:311-321 doi:10.1007/s10858-013-9715-0
- Tugarinov V, Hwang PM, Ollerenshaw JE, Kay LE (2003) Cross-correlated relaxation enhanced H-1-C-13 NMR spectroscopy of methyl groups in very high molecular weight proteins and protein complexes *J Am Chem Soc* 125:10420-10428 doi:10.1021/ja030153x
- Xia YL, Yee A, Arrowsmith CH, Gao XL (2003) H-1(C) and H-1(N) total NOE correlations in a single 3D NMR experiment. N-15 and C-13 time-sharing in t(1) and t(2) dimensions for simultaneous data acquisition *J Biomol NMR* 27:193-203 doi:Doi 10.1023/A:1025407905478
